# Supplementary material
Source: publisher site journal article supplement (https://italianbotanist.pensoft.net/article/12519/download/suppl/31/)
Supplement: Supplementary file 1

**Supplementary data**

**1.** Study area. Surveyed sites are marked with red squares (for details see supplementary 3 and 7-8).

**2.** Thermo-pluviometric diagram of two representative stations of Maddalena Mountains. Observation period of Moliterno station: 1923–2007; Sala Consilina: 1975–1995. Data from “Annali idrologici, Ministero dei lavori pubblici, Servizio idrografico”. Solid line: average monthly values; dashed lined: average monthly maximum temperature; point-dashed line: average monthly minimum temperature.

**3.** Coded locality and geographical features of surveys. Coordinates are reported with decimal degrees WGS84. For detailed topographic map of each sites see Supplementary 7-8.

**4.** The 24 participants of the excursion of the Italian Botanical Society to the Maddalena Mountains, plus P. Scelzo, the Mayor of Brienza, (the second at the bottom from the left) during the visit to the mediaeval Caracciolo's Castle (courtesy of the Municipality of Brienza). Photo V.A. Romano.

**5.** Herbarium acronyms and institutions where the collected samples are stored.

**6.** Floristic list of taxa surveyed in the Maddalena Mountains.

**7.** Topographic map of surveyed sites (1–6). Floristic sampling sites are coded according to Supplementary 1 and 3; the cells grid is 1 × 1 km.

**8.** Topographic map of surveyed sites (7–12). Floristic sampling sites are coded according to Supplementary 1 and 3; the cells grid is 1 × 1 km.


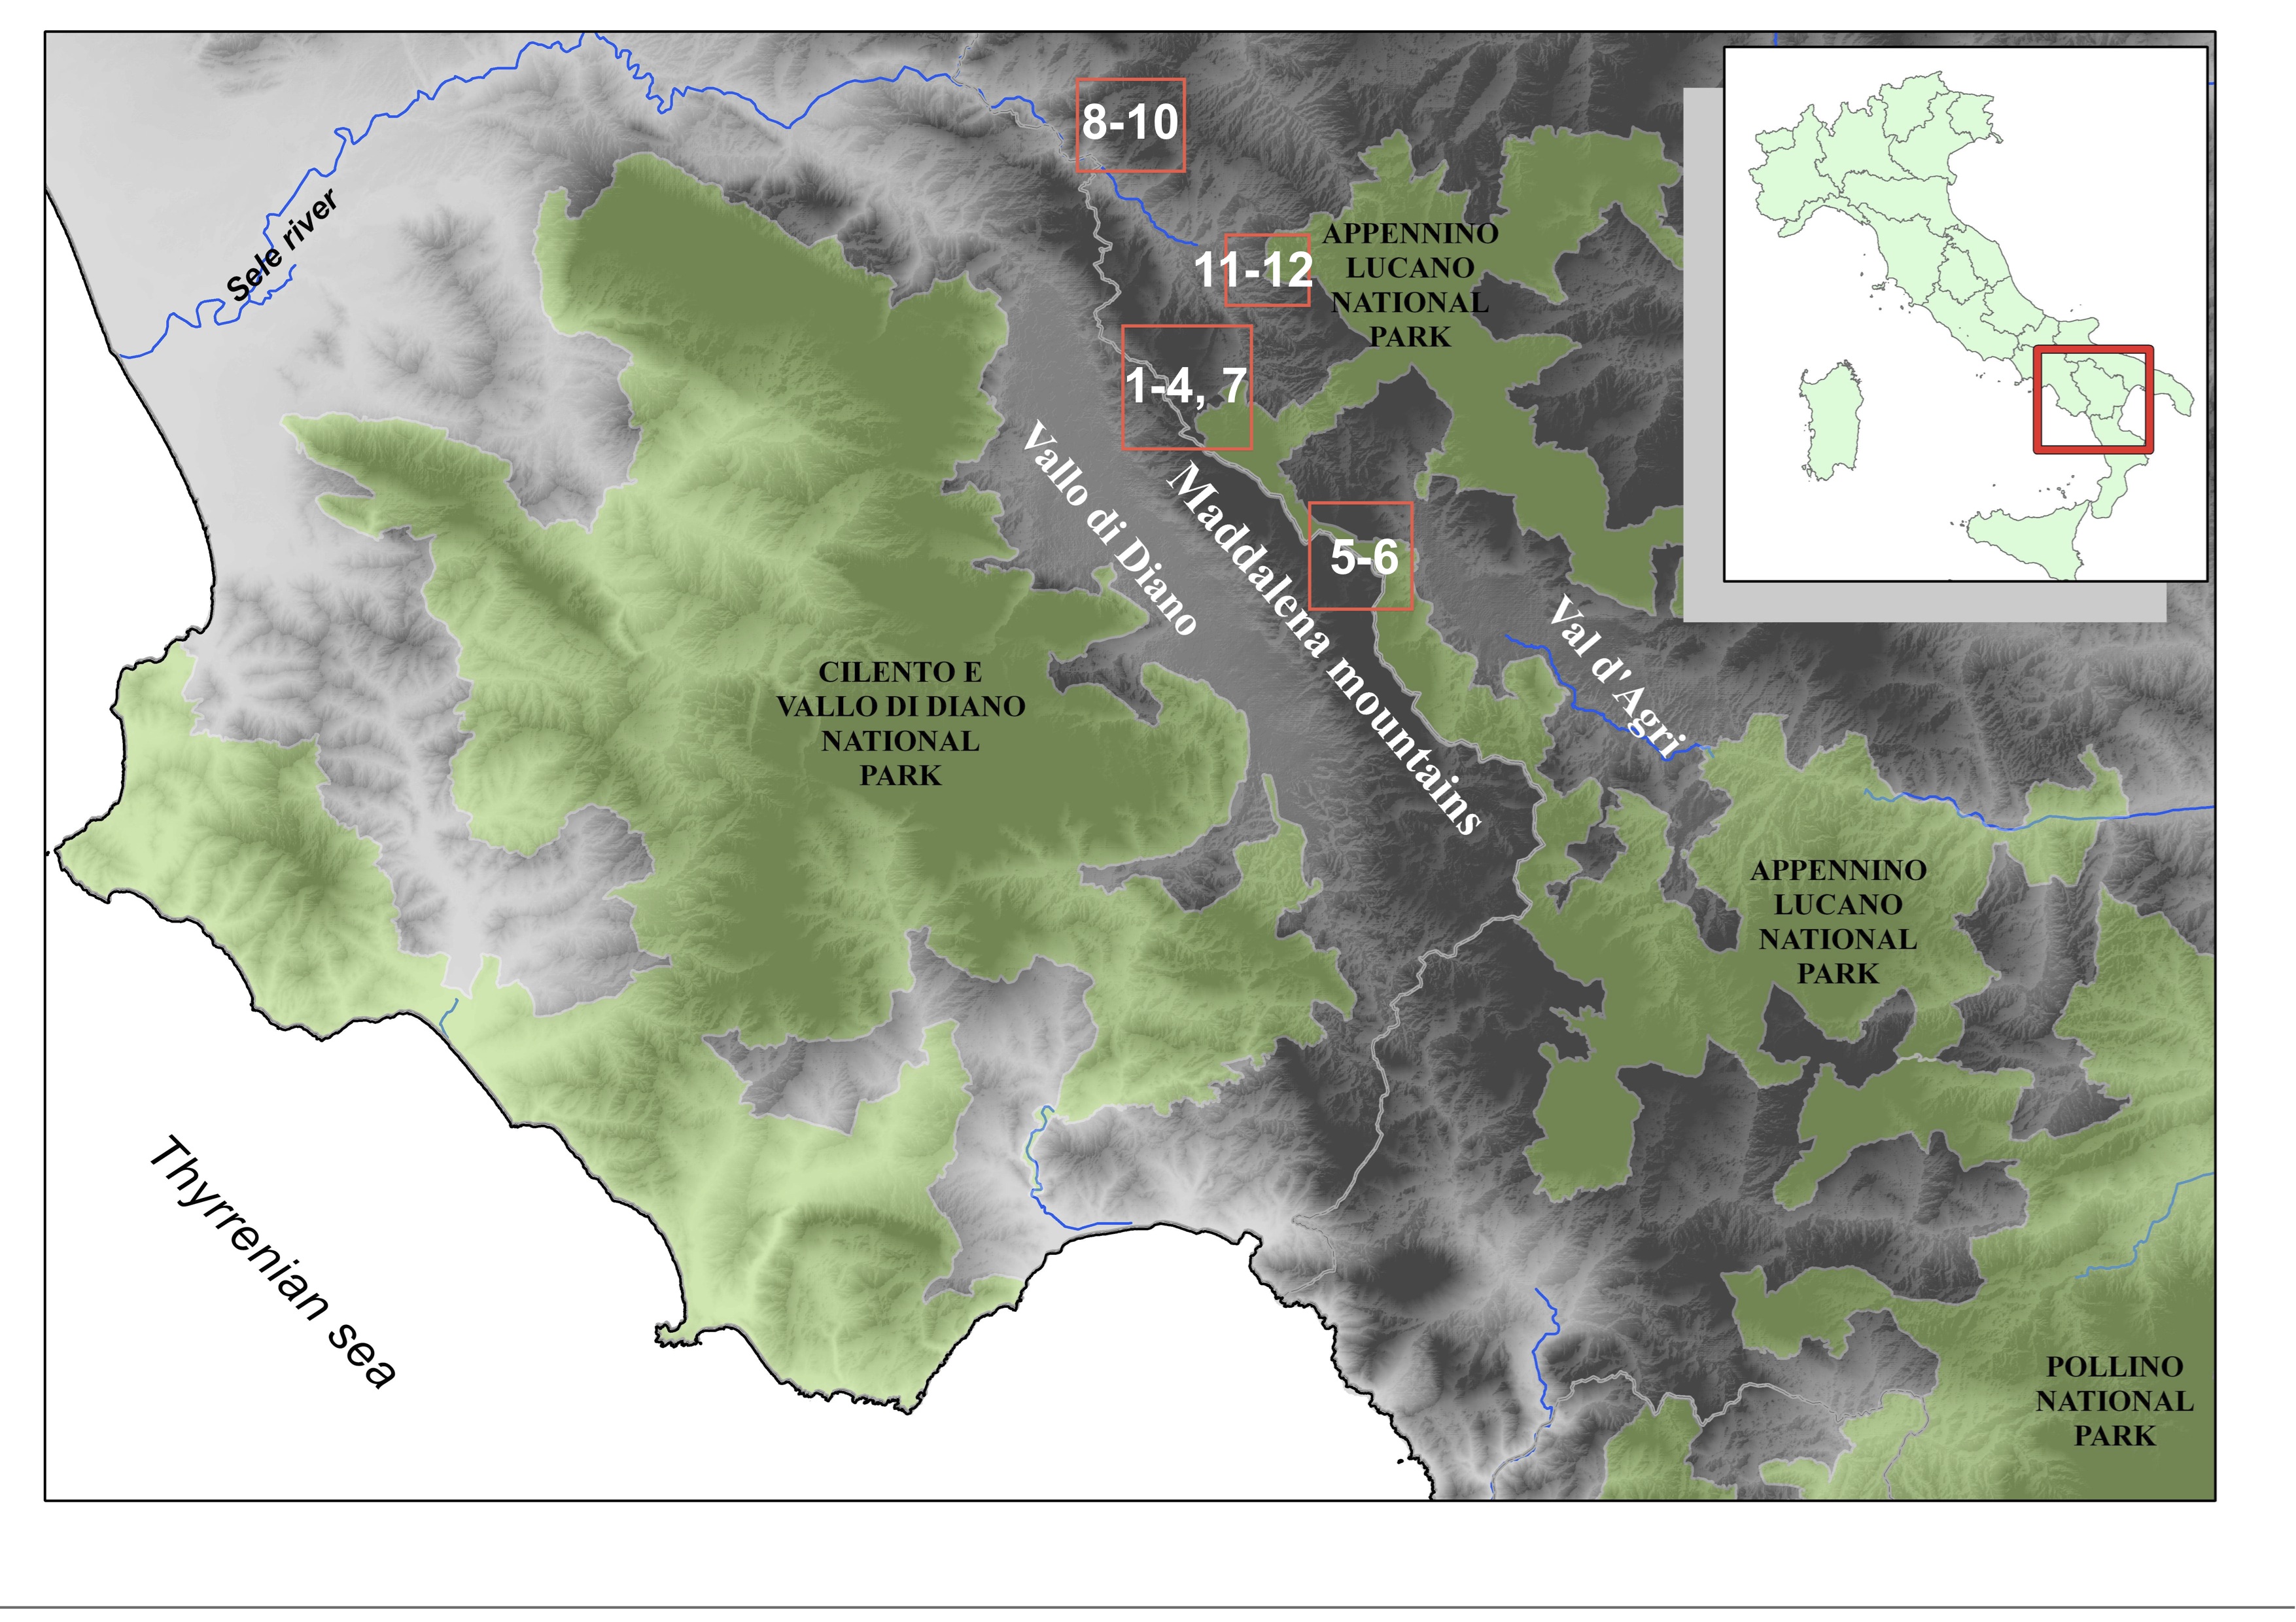
**1.** Study area. Surveyed sites are marked with red squares (for details see supplementary 3 and 7-8).

**2.** Thermo-pluviometric diagram of two representative stations of Maddalena Mountains. Observation period of Moliterno station: 1923–2007; Sala Consilina: 1975–1995. Data from “Annali idrologici, Ministero dei lavori pubblici, Servizio idrografico”. Solid line: average monthly values; dashed lined: average monthly maximum temperature; point-dashed line: average monthly minimum temperature.


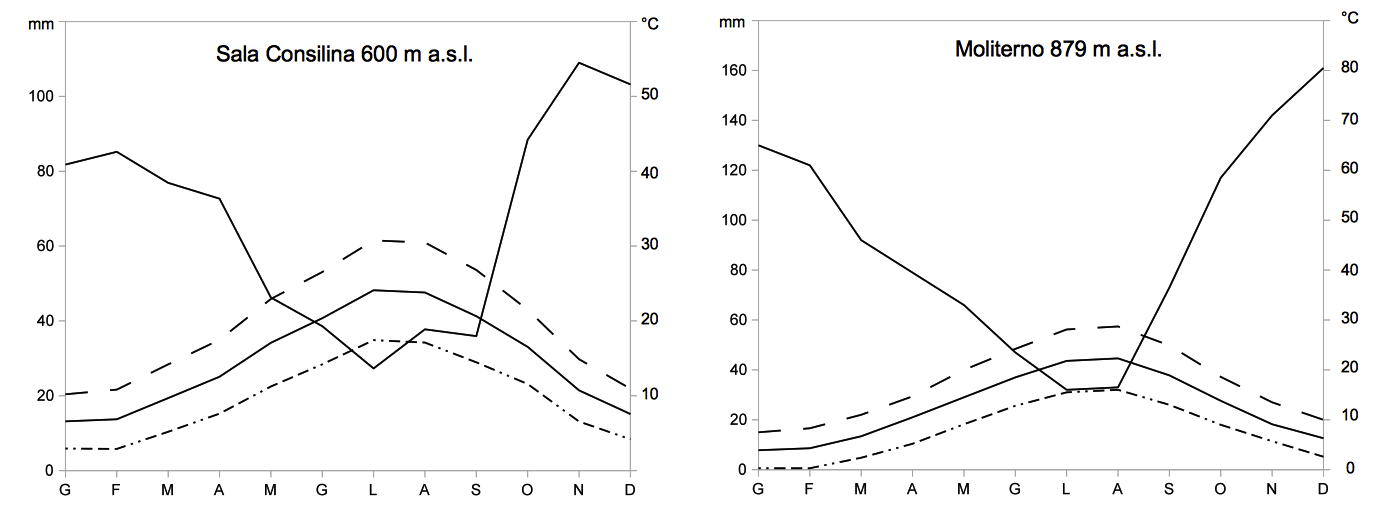


**3.** Coded locality and geographical features of surveys. Coordinates are reported with decimal degrees WGS84. For detailed topographic map of each sites see Supplementary 7-8.

| **Code** | **Sampling** | **Locality** | **Municipality** | **Region** | **Altitude** | **Lithology** | **E** | **N** |
| --- | --- | --- | --- | --- | --- | --- | --- | --- |
| 1 | 5 June 2013 | Castel Ferranti | Brienza | Basilicata | 1050 | Limestones and sandstones | 15.57107 | 40.48503 |
| 2 | 5 June 2013 | Masseria Lopardo | Brienza | Basilicata | 1000 | Limestones | 15.57582 | 40.48816 |
| 3 | 5 June 2013 | Il Lago | Brienza | Basilicata | 1250 | Limestones | 15.63894 | 40.42567 |
| 4a | 5 June 2013 | Faresano | Brienza | Basilicata | 1050 | Dolomite | 15.61312 | 40.43752 |
| 4b | 5 June 2013 | Pozzi | Brienza | Basilicata | 950 | Marls | 15.59320 | 40.45204 |
| 4c | 5 June 2013 | Pozzi | Brienza | Basilicata | 1010 | Marls | 15.59551 | 40.44662 |
| 5 | 6 June 2013 | Mandrano | Padula | Campania | 1030 | Limestones and alluvial soils | 15.69501 | 40.37580 |
| 6 | 6 June 2013 | Mandranello | Padula | Campania | 1060 | Limestones, Dolomite and alluvial soils | 15.68743 | 40.38305 |
| 7 | 7 June 2013 | Castello Caracciolo | Brienza | Basilicata | 700 | Limestones | 15.62531 | 40.48070 |
| 8 | 7 June 2013 | Vallone del Tuorno | Savoia di Lucania | Basilicata | 500 | Siliceous schistus and limestones | 15.53762 | 40.58114 |
| 9 | 7 June 2013 | Serrone | Savoia di Lucania | Basilicata | 600 | Dolomite | 15.54460 | 40.56759 |
| 10 | 7 June 2013 | La Guardiola | Savoia /Vietri | Basilicata | 900 | Marls and Clays | 15.57800 | 40.60494 |
| 11 | 8 June 2013 | Sasso di Castalda | Sasso di Castalda | Basilicata | 980 | Siliceous schistus | 15.67495 | 40.48988 |
| 12 | 8 June 2013 | Buccaglione | Sasso di Castalda | Basilicata | 1000 | Siliceous schistus and Flysch | 15.67262 | 40.49305 |

**4.** The 24 participants of the excursion of the Italian Botanical Society to the Maddalena Mountains, plus P. Scelzo, the Mayor of Brienza, (the second at the bottom from the left) during the visit to the mediaeval Caracciolo's Castle (courtesy of the Municipality of Brienza). Photo V.A. Romano.


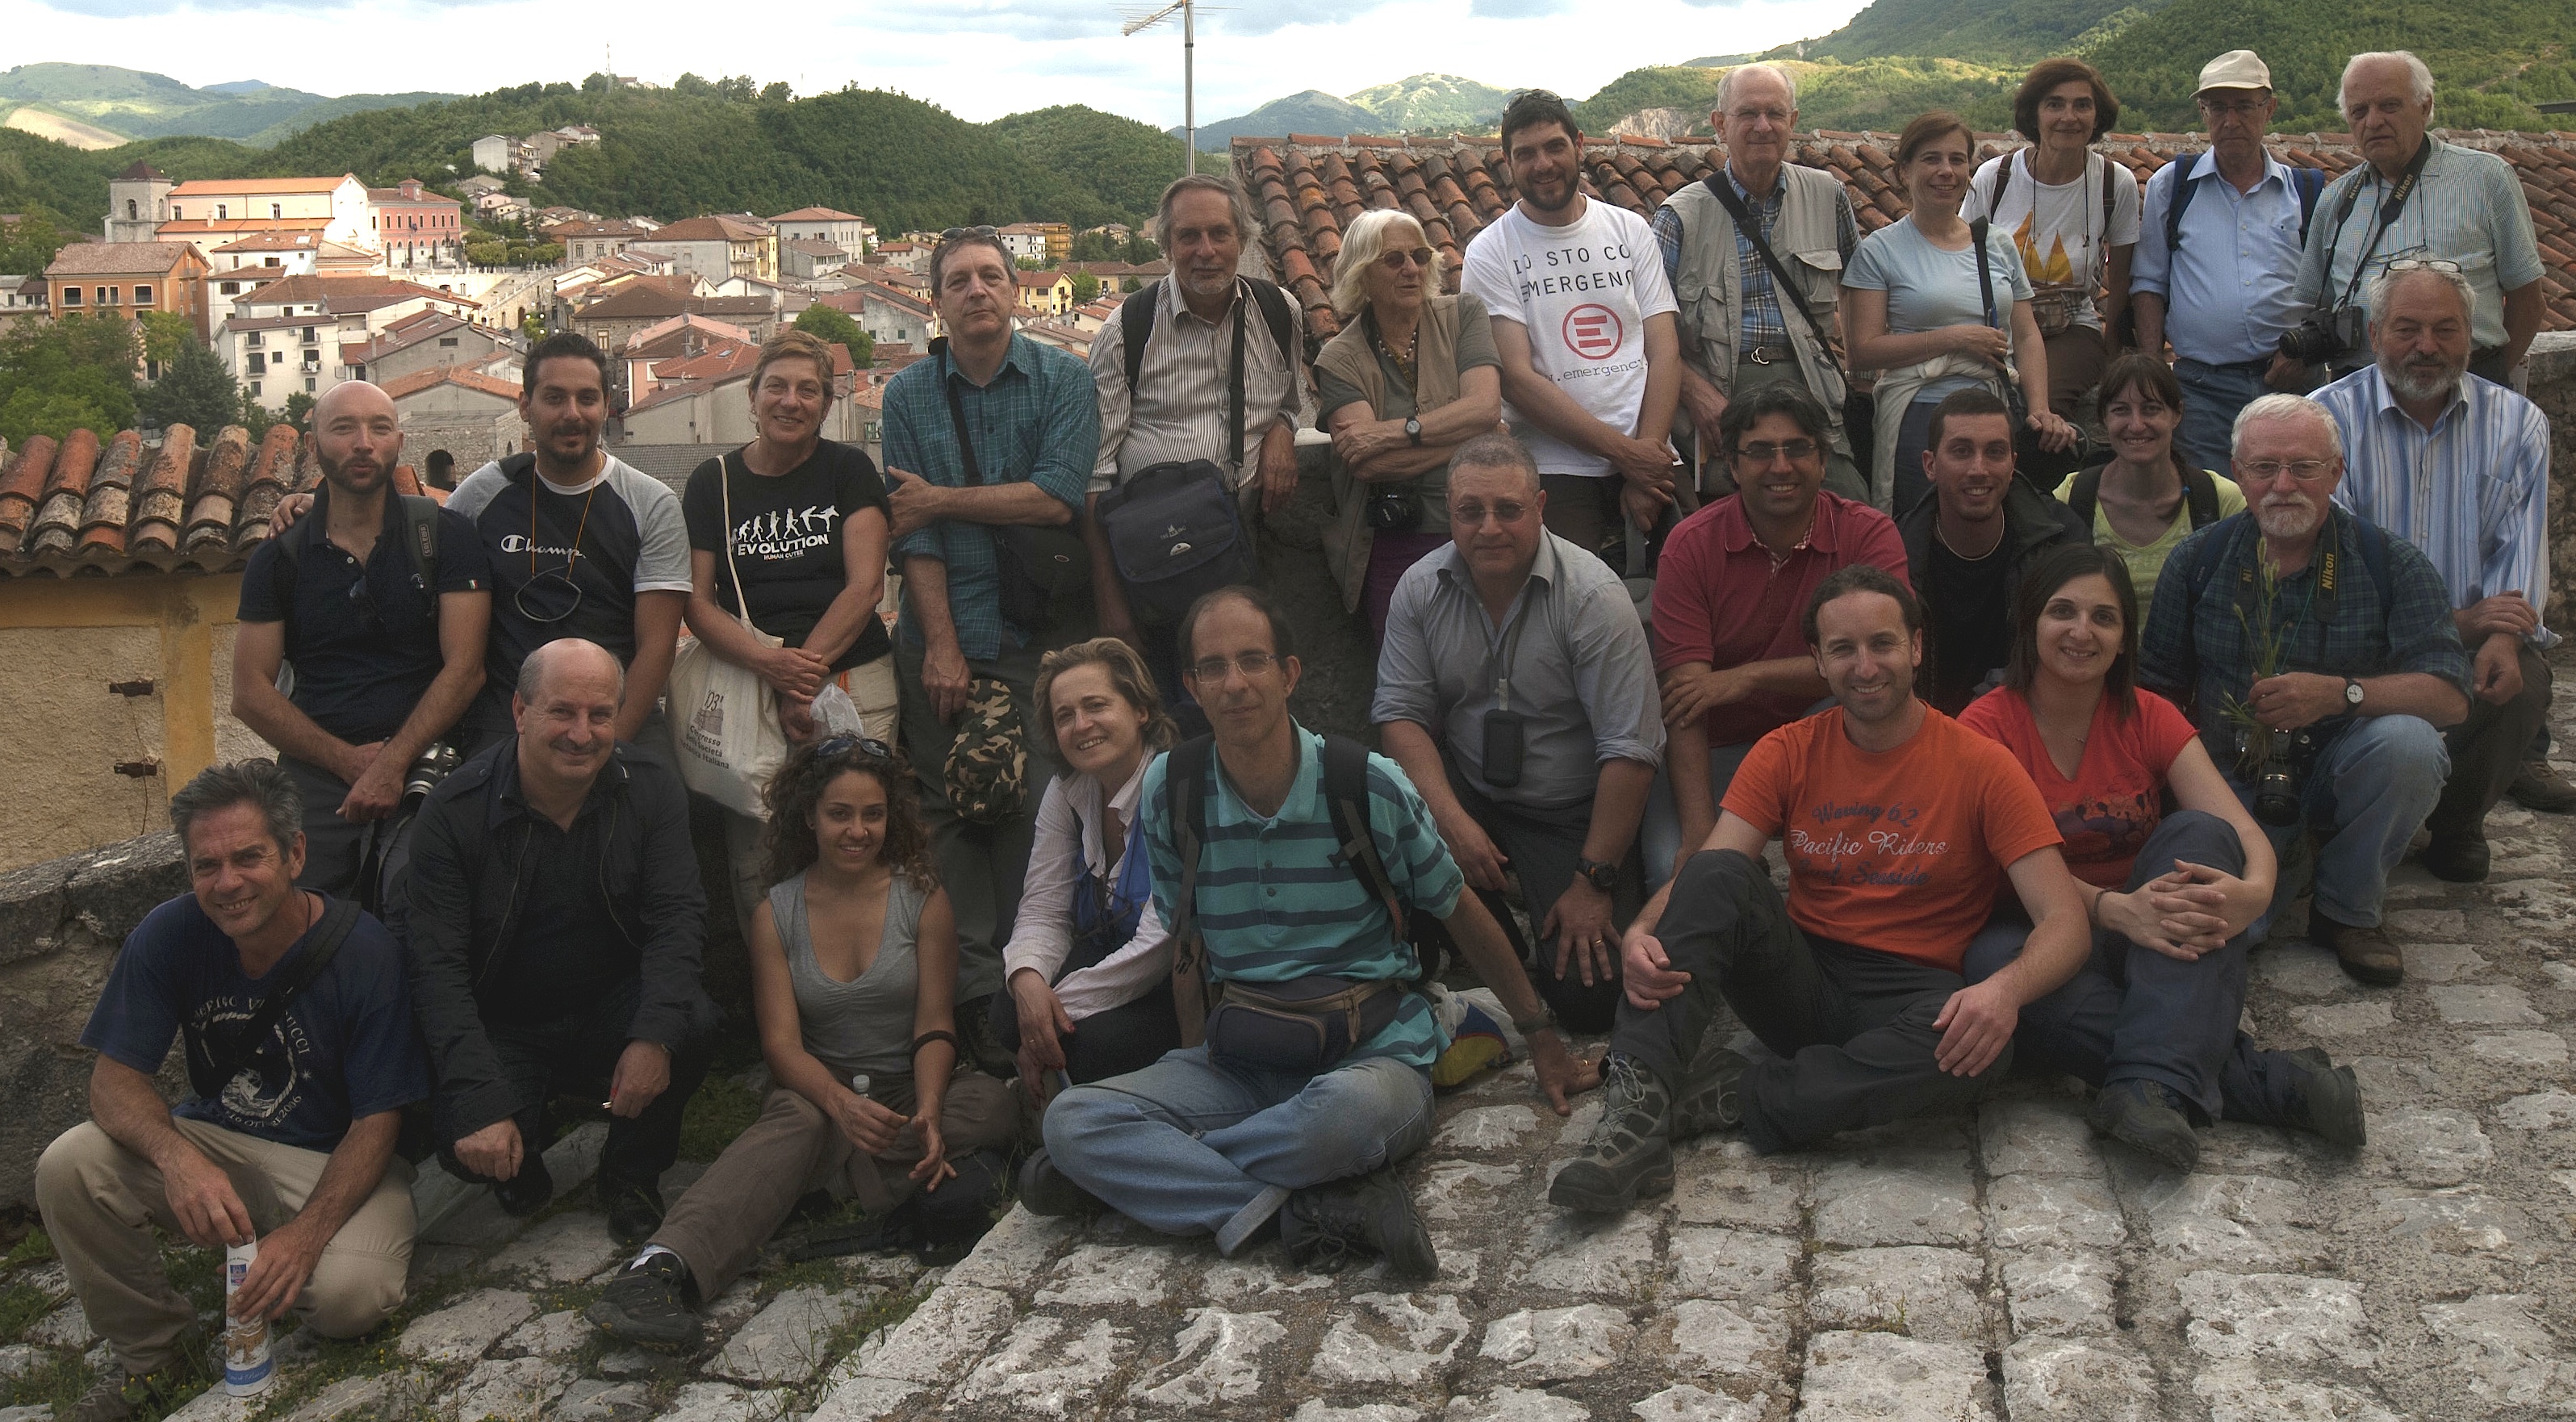


**5.** Herbarium acronyms and institutions where the collected samples are stored.

| **Herbarium code** | **Institution** |
| --- | --- |
| APP | Centro Ricerche Floristiche dell’Appennino, Barisciano, L’Aquila |
| BI | Museo Orto Botanico dell’Università di Bari “Aldo Moro” |
| CLU | Università della Calabria, Cosenza |
| TO | Università di Torino |
| GE | Università di Genova |
| HLUC | Università degli Studi della Basilicata, Potenza |
| MSNM | Museo Civico di Storia Naturale di Milano |
| PORUN | Università di Napoli Federico II, Portici (Napoli) |
| Herb. Cancellieri | private collection of Laura Cancellieri, Univ. Roma Tre, Roma |
| Herb. Caruso | private collection of Giuseppe Caruso, Catanzaro |
| Herb. Faraoni | private collection of Francesco Faraoni, Roma |
| Herb. Lattanzi | private collection of Edda Lattanzi, Roma |
| Herb. Lavezzo | private collection of Paolo Lavezzo, Roma |
| Herb. Salerno | private collection of Giovanni Salerno, Roma |
| Herb. Soldano | private collection of Adriano Soldano, Vercelli |

**6.** Floristic list of taxa surveyed in the Maddalena Mountains. The floristic novelties for the regional flora are marked with asterisks in Appendix 1 (* = confirmed taxon, ** = new for the region; BAS = Basilicata; CAM = Campania). The letter “E” and “A” preceding binomials indicate endemic and alien taxa, respectively.

LYCOPODIIDAE

Selaginellaceae

***Selaginella denticulata*** (L.) Spring

broadleaf forests

8 (APP); 9 (APP, Herb. Soldano)

POLYPODIIDAE

Pteridaceae

***Adiantum*** ***capillus-veneris*** L.

dripping rocks

8 (HLUC)

Cystopteridaceae

***Cystopteris*** ***fragilis*** (L.) Bernh.

shady rocks

12 (Herb. Soldano)

Aspleniaceae

***Asplenium ceterach*** L. subsp. ***ceterach***

[*Ceterach* *officinarum* Willd. subsp. *officinarum*]

broadleaf forests and walls

8 (Herb. Soldano)

***Asplenium*** ***onopteris*** L.

broadleaf forests

8 (APP, Herb. Cancellieri, Herb. Lavezzo, PORUN, Herb. Soldano)

***Asplenium*** ***trichomanes*** L. subsp. ***quadrivalens*** D.E.Mey.

broadleaf forests

8 (APP, Herb. Cancellieri, HLUC, Herb. Soldano)

Dryopteridaceae

***Polystichum*** ***setiferum*** (Forssk.) T.Moore ex Woyn.

broadleaf forests

8 (Herb. Soldano)

Polypodiaceae

***Polypodium*** ***cambricum*** L.

broadleaf forests

8 (HLUC, PORUN, Herb. Soldano)

***Polypodium vulgare*** L.

broadleaf forests

8 (MSNM, PORUN)

PINIDAE

Pinaceae

***Pinus*** ***halepensis*** Mill. subsp. ***halepensis***

dry grasslands

9 (PORUN)

MAGNOLIIDAE

Aristolochiaceae

***Aristolochia*** ***lutea*** Desf.

broadleaf forests

3 (APP); 5 (Herb. Cancellieri); 6 (Herb. Caruso)

Alismataceae

*CAM ***Alisma*** ***lanceolatum*** With.

wetlands

6 (APP)

Araceae

***Arisarum*** ***proboscideum*** (L.) Savi

broadleaf forests

8 (CLU)

***Arum*** ***maculatum*** L.

broadleaf forests

3 (CLU, HLUC, PORUN)

Colchicaceae

**BAS ***Colchicum*** ***lusitanum*** Brot.

pastures

2 (HLUC); 5 (CLU)

Liliaceae

***Gagea*** ***lutea*** (L.) Ker Gawl.

broadleaf forests

5 (HLUC)

Amaryllidaceae

***Allium*** ***nigrum*** L.

arable lands

1 (HLUC, PORUN)

***Allium*** ***pendulinum*** Ten.

broadleaf forests

2 (Herb. Faraoni)

***Allium*** ***subhirsutum*** L. subsp. ***subhirsutum***

along trails

8 (CLU)

***Allium*** ***ursinum*** L.

beech forests

3 (Herb. Cancellieri, PORUN)

***Narcissus*** ***poëticus*** L.

pastures

6 (MSNM)

***Narcissus*** ***tazetta*** L. subsp. ***tazetta***

broadleaf forests

1 (HLUC)

Asparagaceae

***Anthericum*** ***liliago*** L.

dry grasslands and garrigues

4a (APP, BI, GE, Herb. Caruso); 5 (Herb. Faraoni, Herb. Cancellieri); 9 (MSNM, PORUN)

**BAS ***Asparagus*** ***tenuifolius*** Lam.

broadleaf forests

8 (Herb. Soldano)

***Loncomelos*** ***pyrenaicus*** (L.) L.D.Hrouda subsp. ***pyrenaicus***

[*Ornithogalum pyrenaicum* L.]

forest edges

5 (HLUC)

***Muscari*** ***comosum*** (L.) Mill.

pastures

1 (Herb. Cancellieri); 3 (PORUN)

***Muscari*** ***neglectum*** Guss. ex Ten.

pastures

1 (TO)

***Ornithogalum*** ***montanum*** Cirillo ex Ten.

pastures

1 (HLUC); 3 (APP, GE, Herb. Faraoni, Herb. Cancellieri, HLUC, MSNM); 5 (APP, CLU); 6 (HLUC)

***Polygonatum*** ***multiflorum*** (L.) All.

beech forests

6 (HLUC, PORUN, Herb. Cancellieri)

***Scilla*** ***bifolia*** L.

beech forests

6 (HLUC)

Asphodelaceae

***Asphodeline*** ***liburnica*** (Scop.) Rchb.

dry grasslands and garrigues

1 (HLUC)

***Asphodeline*** ***lutea*** (L.) Rchb.

broadleaf forests

1 (HLUC)

***Asphodelus*** ***macrocarpus*** Parl. subsp. ***macrocarpus***

pastures

3 (APP); 6 (Herb. Lavezzo)

Iridaceae

***Chamaeiris*** ***lorea*** (Janka) Peruzzi, F.Conti & Bartolucci

[*Iris lorea* Janka]

wet meadows

10 (APP, CLU, GE, Herb. Cancellieri, Herb. Lavezzo, MSNM, PORUN, Herb. Soldano)

***Crocus neapolitanus*** (Ker Gawl.) Loisel.

pastures

5 (CLU); 6 (HLUC)

A ***Gladiolus*** ***italicus*** Mill.

arable land

1 (HLUC, PORUN); 4b (Herb. Lattanzi)

***Hermodactylus*** ***tuberosus*** (L.) Mill.

uncultivated land, forest edges

1 (Herb. Salerno)

***Romulea*** ***bulbocodium*** (L.) Sebast. & Mauri

pastures

9 (GE, HLUC); 10 (HLUC)

Orchidaceae

***Anacamptis*** ***coriophora*** (L.) R.M.Bateman, Pridgeon & M.W.Chase

[*Orchis* *coriopophora* L.]

dry grasslands and garrigues

4a (APP, GE, HLUC)

***Anacamptis*** ***laxiflora*** (Lam.) R.M.Bateman, Pridgeon & M.W.Chase

[*Orchis* *laxiflora* Lam.]

wet meadows

5 (HLUC); 6 (APP, MSNM, HLUC); 10 (HLUC)

***Anacamptis*** ***morio*** (L.) R.M.Bateman, Pridgeon & M.W.Chase

[*Orchis* *morio* L.]

pastures

4a (HLUC); 5 (HLUC); 6 (HLUC); 10 (HLUC); 11 (HLUC); 12 (HLUC)

***Anacamptis*** ***morio*** (L.) R.M.Bateman, Pridgeon & M.W.Chase × ***Anacamptis*** ***laxiflora*** (Lam.) R.M.Bateman, Pridgeon & M.W.Chase

pastures

6 (HLUC)

***Anacamptis*** ***papilionacea*** (L.) R.M.Bateman, Pridgeon & M.W.Chase

[*Orchis* *papilionacea* L.]

pastures

4a (HLUC); 5 (HLUC); 10 (HLUC); 11 (HLUC); 12 (HLUC, APP)

***Anacamptis*** ***pyramidalis*** (L.) Rich.

pastures

4a (HLUC); 4b (HLUC); 4c (HLUC); 8 (PORUN, HLUC); 10 (PORUN)

***Cephalanthera*** ***damasonium*** (Mill.) Druce

broadleaf forests

3 (HLUC); 5 (HLUC)

***Cephalanthera*** ***longifolia*** (L.) Fritsch

broadleaf forests

3 (HLUC, PORUN)

***Cephalanthera*** ***rubra*** (L.) Rich.

beech forests

3 (HLUC); 5 (HLUC)

***Dactylorhiza*** ***incarnata*** (L.) Soó subsp. ***incarnata***

wet meadows

6 (HLUC)

***Dactylorhiza*** ***maculata*** (L.) Soó subsp. ***saccifera*** (Brongn.) Diklić

wet meadows and broadleaf forests

6 (HLUC, PORUN); 12 (PORUN)

***Dactylorhiza*** ***sambucina*** (L.) Soó

pastures

3 (HLUC); 5 (HLUC); 6 (HLUC); 10 (HLUC); 11 (HLUC) ; 12 (HLUC)

***Coeloglossum*** ***viride*** (L.) Hartm.

[*Dactylorhiza* *viridis* (L.) R.M.Bateman, Pridgeon & Chase]

3 (APP, PORUN, HLUC)

E ***Epipactis*** ***collaris*** S.Hertel

beech forests

3 (HLUC)

It is a newly described species (Hertel & Presser 2015), as a consequence of extensive research of V.A. Romano subsequent to the field trip, whose locus classicus is located in the study area in the beech forests in the locality Il Lago (Brienza).

***Epipactis*** ***exilis*** P.Delforge

beech forests

3 (HLUC); 5 (HLUC)

E ***Epipactis*** ***lucana*** H.Presser, S.Hertel & V.A.Romano

beech forests

3 (HLUC)

As for *E. collaris*, it is a newly described species (Hertel & Presser 2015), as a consequence of extensive research of V.A. Romano subsequent to the field trip, whose locus classicus is located in the study area, in the beech forests of Il Lago (Brienza).

**E ***Epipactis*** ***meridionalis*** H.Baumann & R.Lorenz

broadleaf forests

3 (HLUC); 5 (HLUC)

***Epipactis*** ***microphylla*** (Ehrh.) Sw.

broadleaf forests

3 (HLUC); 5 (HLUC)

***Epipactis*** ***naousaensis*** Robatsch.

beech forests

3 (HLUC); 5 (HLUC)

***Himantoglossum*** ***adriaticum*** H.Baumann

along trails

5 (HLUC)

***Himantoglossum*** ***hircinum*** (L.) Spreng.

along trails

4a (HLUC)

***Limodorum*** ***abortivum*** (L.) Sw.

broadleaf forests

12 (APP)

***Neotinea*** ***maculata*** (Desf.) Stearn

dry grasslands and garrigues

3 (HLUC); 5 (HLUC); 6 (HLUC); 12 (APP)

***Neotinea*** ***tridentata*** (Scop.) R.M.Bateman, Pridgeon & M.W.Chase

[*Orchis* *tridentata* Scop.]

pastures

3 (HLUC, APP, PORUN); 5 (HLUC); 6 (HLUC); 12 (HLUC)

***Neotinea*** ***ustulata*** (L.) R.M.Bateman, Pridgeon & M.W.Chase

[*Orchis* *ustulata* L.]

pastures

3 (HLUC); 5 (HLUC); 6 (HLUC); 12 (HLUC)

***Neottia*** ***nidus-avis*** (L.) Rich.

beech forests

3 (HLUC, PORUN); 5 (HLUC)

***Ophrys*** ***apifera*** Huds var. ***bicolor*** (Nägeli) E.Nelson

pastures

4c (HLUC)

***Ophrys*** ***apifera*** Huds. var. ***apifera***

pastures and uncultivated lands

4a (HLUC); 5 (TO, PORUN, HLUC); 10 (HLUC)

E ***Ophrys*** ***exaltata*** Ten. subsp. ***exaltata***

pastures

5 (HLUC)

***Ophrys*** ***incubacea*** Bianca

pastures

4a (HLUC); 10 (HLUC); 11 (HLUC); 12 (HLUC)

***Ophrys*** ***lacaitae*** Lojac.

dry grasslands and garrigues

10 (HLUC); 11 (HLUC); 12 (HLUC)

E ***Ophrys*** ***lucana*** P.Delforge, Devillers-Tersch. & Devillers

pastures

4a (HLUC); 10 (HLUC) 11 (HLUC); 12 (HLUC)

***Ophrys*** ***lutea*** Cav.

pastures

5 (HLUC); 10 (HLUC); 11 (HLUC); 12 (HLUC)

***Ophrys*** ***sicula*** Tineo

pastures

8 (HLUC)

***Ophrys*** ***passionis*** Sennen ex Devillers-Tersch. & Devillers subsp. ***passionis***

pastures

8 (HLUC)

***Ophrys*** ***classica*** Devillers-Tersch. & Devillers

pastures

8 (HLUC)

E ***Ophrys*** ***tenthredinifera*** Willd. subsp. ***neglecta*** (Parl.) E.G.Camus

pastures

4a (HLUC); 10 (HLUC); 12 (HLUC)

***Orchis*** ***anthropophora*** (L.) All.

dry grasslands and garrigues

6 (HLUC, PORUN)

***Orchis*** ***italica*** Poir.

pastures

5 (HLUC); 6 (HLUC)

***Orchis*** ***mascula*** (L.) L. subsp. ***mascula***

pastures

5 (HLUC); 6 (HLUC)

***Orchis*** ***pauciflora*** Ten.

dry grasslands and garrigues

5 (HLUC); 6 (HLUC); 9 (HLUC); 10 (HLUC); 11 (HLUC); 12 (HLUC)

***Orchis*** ***provincialis*** Balb. ex Lam. & DC.

dry grasslands and garrigues

5 (HLUC); 6 (HLUC); 12 (HLUC)

***Orchis*** ***purpurea*** Huds.

pastures

4a (HLUC); 8 (HLUC); 10 (HLUC)

***Orchis*** ***quadripunctata*** Cirillo ex Ten.

dry grasslands and garrigues

5 (HLUC); 6 (HLUC); 11 (HLUC); 12 (HLUC)

***Orchis*** ***simia*** Lam.

pastures

5 (HLUC); 6 (HLUC); 10 (HLUC); 12 (HLUC)

***Serapias*** ***cordigera*** L.

pastures

10 (HLUC)

***Serapias*** ***lingua*** L.

pastures

4a (HLUC) 10 (APP, HLUC); 12 (HLUC

***Serapias*** ***parviflora*** Parl.

pastures

4a (HLUC); 10 (HLUC); 11 (HLUC); 12 (HLUC)

***Serapias*** ***vomeracea*** (Burm.f.) Briq.

pastures

4a (HLUC); 8 (APP); 10 (APP, HLUC); 11 (HLUC); 12 (HLUC)

Cyperaceae

***Carex*** ***caryophyllea*** Latourr.

pastures

3 (Herb. Cancellieri, HLUC); 5 (TO); 10 (TO, Herb. Cancellieri, Herb. Soldano)

***Carex*** ***depauperata*** Curtis ex With.

pastures

5 (BI)

***Carex*** ***distachya*** Desf.

broadleaf forests

9 (HLUC); 12 (Herb. Soldano)

***Carex*** ***distans*** L.

pastures

6 (APP, Herb. Salerno); 10 (TO, Herb. Cancellieri)

***Carex*** ***divulsa*** Stokes

wet meadows

5 (APP); 10 (APP)

***Carex*** ***flacca*** Schreb. subsp. ***serrulata*** (Biv. ex Spreng.) Greuter

pastures

10 (Herb. Cancellieri)

***Carex*** ***hirta*** L.

wet meadows

3 (BI, CLU, Herb. Cancellieri, Herb. Salerno); 6 (APP, TO, Herb. Lattanzi, Herb. Cancellieri, HLUC)

**BAS ***Carex*** ***humilis*** Leyss.

dry grasslands and garrigues

9 (Herb. Cancellieri, Herb. Salerno)

***Carex*** ***leporina*** L.

[*Carex* *ovalis* Gooden.]

wet meadows

6 (Herb. Faraoni, Herb. Cancellieri, Herb. Salerno, HLUC, MSNM)

***Carex*** ***macrolepis*** DC.

dry grasslands and garrigues

4a (Herb. Caruso); 5 (Herb. Caruso, Herb. Cancellieri, Herb. Salerno)

***Carex*** ***otrubae*** Podp.

wet meadows

6 (APP, Herb. Faraoni, Herb. Cancellieri, HLUC, PORUN)

***Carex*** ***paniculata*** L. subsp. ***paniculata***

wetllands

6 (APP, CLU, HLUC, MSNM, Herb. Cancellieri, Herb. Lavezzo, Herb. Salerno, Herb. Soldano)

***Carex*** ***pendula*** Huds.

wetllands

8 (TO, Herb. Soldano)

***Carex*** ***spicata*** Huds.

pastures

3 (Herb. Cancellieri)

**CAM ***Carex*** ***tomentosa*** L.

[*Carex* *filiformis* L.]

wet meadows

6 (APP, Herb. Cancellieri)

***Carex*** ***viridula*** Michx.

wetllands

6 (APP, CLU, Herb. Cancellieri, Herb. Salerno, HLUC)

***Eleocharis*** ***palustris*** (L.) Roem. & Schult. subsp. ***palustris***

wetlands

1 (HLUC); 3 (HLUC); 5 (HLUC); 6 (Herb. Cancellieri); 10 (Herb. Cancellieri, Herb. Soldano)

Juncaceae

***Juncus*** ***compressus*** Jacq.

wetlands

3 (Herb. Lavezzo, HLUC, APP)

***Juncus*** ***conglomeratus*** L.

wetlands

10 (Herb. Salerno, PORUN)

***Juncus*** ***inflexus*** L. subsp. ***inflexus***

wetlands

6 (HLUC, MSNM)

**CAM ***Juncus*** ***tenageia*** L.f. subsp. ***tenageia***

wetlands

6 (Herb. Soldano)

***Luzula*** ***campestris*** (L.) DC. subsp. ***campestris***

pastures

3 (APP, BI, Herb. Faraoni, Herb. Caruso, Herb. Cancellieri, HLUC, MSNM); 6 (CLU)

***Luzula*** ***forsteri*** (Sm.) DC.

broadleaf forests

1 (MSNM); 2 (Herb. Cancellieri); 3 (Herb. Cancellieri, PORUN); 8 (Herb. Cancellieri)

E ***Luzula*** ***sylvatica*** (Huds.) Gaudin subsp. ***sicula*** (Parl.) K.Richt.

beech forests

3 (Herb. Cancellieri); 8 (HLUC)

Poaceae

***Aira*** ***caryophyllea*** L. subsp. ***caryophyllea***

pastures

1 (HLUC); 5 (MSNM); 12 (APP)

***Aira*** ***elegantissima*** Schur subsp. ***elegantissima***

pastures

10 (CLU, GE, Herb. Lavezzo, HLUC, PORUN)

*CAM ***Alopecurus*** ***aequalis*** Sobol.

pastures

6 (GE)

***Alopecurus*** ***myosuroides*** Huds. subsp. ***myosuroides***

arable lands

1 (Herb. Lavezzo, HLUC, PORUN)

***Alopecurus*** ***pratensis*** L. subsp. ***pratensis***

pastures

6 (MSNM, Herb. Salerno)

***Anisantha*** ***diandra*** (Roth) Tutin ex Tzvelev

[*Bromus* *diandrus* Thunb.]

along roads and trails

7 (HLUC); 8 (MSNM)

***Anisantha*** ***madritensis*** (L.) Nevski subsp. ***madritensis***

[*Bromus* *madritensis* L.]

dry grasslands and garrigues

4a (MSNM); 11 (CLU, GE)

***Anisantha*** ***sterilis*** (L.) Nevski

[*Bromus* *sterilis* L.]

along roads and trails

1 (Herb. Cancellieri)

***Anthoxanthum*** ***odoratum*** L.

pastures

3 (Herb. Faraoni, Herb. Caruso, Herb. Cancellieri, Herb. Salerno, HLUC, PORUN)

***Arrhenatherum*** ***elatius*** (L.) P.Beauv. ex J.Presl & C.Presl subsp. ***elatius***

pastures

1 (HLUC); 5 (Herb. Salerno)

***Briza*** ***maxima*** L.

dry grasslands and garrigues

1 (Herb. Cancellieri, Herb. Salerno, HLUC); 10 (HLUC, Herb. Soldano)

***Briza*** ***media*** L.

pastures

3 (BI); 6 (PORUN)

***Bromopsis*** ***erecta*** (Huds.) Fourr. subsp. ***erecta***

[*Bromus* *erectus* Huds. subsp. *erectus*]

dry grasslands and garrigues

1 (Herb. Cancellieri, HLUC); 3 (Herb. Caruso, Herb. Cancellieri, PORUN); 4a (APP, HLUC); 4c (Herb. Caruso); 5 (Herb. Caruso); 10 (BI, HLUC, PORUN)

***Bromus*** ***hordeaceus*** L. subsp. ***hordeaceus***

pastures

3 (HLUC); 10 (Herb. Cancellieri)

**CAM ***Bromus*** ***hordeaceus*** L. subsp. ***pseudothominei*** (P.M.Sm.) H.Scholz

pastures

5 (PORUN)

***Bromus*** ***squarrosus*** L. subsp. ***squarrosus***

dry grasslands and garrigues

5 (Herb. Faraoni, Herb. Lattanzi, Herb. Cancellieri, MSNM)

***Catapodium*** ***rigidum*** (L.) C.E.Hubb. subsp. ***rigidum***

dry grasslands and garrigues

7 (Herb. Cancellieri); 8 (Herb. Cancellieri, PORUN)

***Cynosurus*** ***cristatus*** L.

pastures

1 (Herb. Cancellieri, Herb. Salerno); 10 (BI, GE, Herb. Faraoni, Herb. Cancellieri, PORUN)

***Cynosurus*** ***echinatus*** L.

dry grasslands and garrigues

1 (Herb. Salerno, HLUC); 3 (Herb. Cancellieri); 8 (PORUN)

***Cynosurus*** ***effusus*** Link

forest edges

1 (MSNM); 6 (PORUN)

***Dactylis*** ***glomerata*** L. subsp. ***hispanica*** (Roth) Nyman

forest edges

1 (PORUN); 5 (PORUN)

***Danthonia*** ***decumbens*** (L.) DC. subsp. ***decumbens***

pastures

6 (APP)

***Dasypyrum*** ***villosum*** (L.) P.Candargy

dry grasslands and garrigues

1 (Herb. Salerno, HLUC)

***Deschampsia*** ***cespitosa*** (L.) P.Beauv. subsp. ***cespitosa***

wet meadows

6 (HLUC, Herb. Cancellieri, MSNM)

E ***Drymochloa*** ***drymeja*** (Mert. & W.D.J.Koch) Holub subsp. ***exaltata*** (C.Presl) Foggi & Signorini

[*Festuca* *exaltata* C.Presl]

broadleaf forests

8 (CLU, HLUC, MSNM, PORUN)

***Festuca*** ***ciliata*** Gouan

[*Vulpia* *ciliata* Dumort.]

ruins

7 (GE, Herb. Cancellieri, HLUC, MSNM, PORUN)

***Festuca*** ***circummediterranea*** Patzke

pastures

1 (Herb. Salerno); 6 (Herb. Faraoni); 12 (MSNM)

***Festuca*** ***geniculata*** (L.) Lag. & Rodr.

[*Vulpia* *geniculata* (L.) Link]

ruins

7 (PORUN, HLUC)

***Festuca*** ***heterophylla*** Lam.

broadleaf forests

3 (Herb. Cancellieri)

***Festuca*** ***muralis*** Kunth

[*Vulpia muralis* (Kunth) Nees]

pastures

10 (PORUN)

***Festuca*** ***myuros*** L. subsp. ***myuros***

[*Vulpia* *myuros* (L.) C.C.Gmel. subsp. *myuros*]

ruins

7 (MSNM)

***Glyceria*** ***fluitans*** (L.) R.Br.

wetlands

6 (MSNM)

***Glyceria*** ***notata*** Chevall.

wetlands

1 (HLUC); 6 (Herb. Salerno, PORUN); 10 (HLUC)

E ***Helictochloa*** ***praetutiana*** (Parl. ex Arcang.) Bartolucci, F.Conti, Peruzzi & Banfi subsp. ***praetutiana***

[*Avenula* *praetutiana* (Parl. ex Arcang.) Pignatti]

dry grasslands and garrigues

5 (Herb. Faraoni, MSMN)

We have referred all the samples of *Helictochloa* herein even if the sample in MSMN would seem to resemble *H. praeusta* (taxon not present in central and southern Italian Peninsula).

***Holcus*** ***lanatus*** L. subsp. ***lanatus***

pastures

6 (HLUC)

***Holcus*** ***mollis*** L. subsp. ***mollis***

pastures

6 (Herb. Faraoni)

***Hordeum*** ***bulbosum*** L.

along trails

1 (Herb. Faraoni, Herb. Cancellieri, Herb. Salerno, HLUC)

**CAM ***Hordeum*** ***geniculatum*** All.

[*Hordeum* *marinum* Huds. subsp. *gussoneanum* (Parl.) K. Richt.]

dry grasslands and garrigues

1 (Herb. Faraoni, Herb. Cancellieri, Herb. Salerno, HLUC, PORUN); 2 (MSNM); 5 (APP)

***Hordeum*** ***murinum*** L. subsp. ***leporinum*** (Link) Arcang.

along trails

1 (HLUC); 7 (Herb. Cancellieri)

**CAM, E ***Koeleria*** ***lucana*** Brullo, Giusso & Miniss.

dry grasslands and garrigues

1 (Herb. Cancellieri, Herb. Salerno, MSNM); 3 (Herb. Cancellieri); 4a (CLU); 5 (Herb. Lattanzi, MSNM; Herb. Faraoni); 9 (CLU, Herb. Lattanzi, Herb. Cancellieri, HLUC, MSNM; Herb. Faraoni); 11 (GE); 12 (MSNM)

**BAS, E **Koeleria splendens** C.Presl

[incl. *Koeleria* *splendens* C.Presl subsp. *brutia* Brullo, Gangale & Uzunov]

dry grasslands and garrigues

9 (GE); 11 (MSNM)

***Lolium*** ***arundinaceum*** (Schreb.) Darbysh subsp. ***arundinaceum***

[*Schedonorus* *arundinaceus* (Schreb.) Dumort. subsp. *arundinaceus*]

pastures

6 (CLU, Herb. Salerno)

***Lolium*** ***multiflorum*** Lam.

arable lands

1 (BI); 5 (Herb. Salerno)

***Lolium*** ***perenne*** L.

dry grasslands and garrigues

8 (MSNM)

***Lolium*** ***rigidum*** Gaudin subsp. ***rigidum***

arable lands

2 (MSNM)

***Lolium*** ***temulentum*** L.

arable lands

1 (Herb. Salerno, Herb. Lavezzo, HLUC)

***Melica*** ***ciliata*** L. subsp. ***ciliata***

[incl. *Melica* *ciliata* subsp. *glauca* (F.W.Schultz) Nyman]

pastures

9 (HLUC)

***Melica*** ***transsilvanica*** Schur subsp. ***klokovii*** Tzvelev

ruins and rocks

7 (CLU, HLUC, MSNM); 8 (MSNM, PORUN); 9 (MSNM)

***Melica*** ***uniflora*** Retz.

broadleaf forests

2 (Herb. Salerno, PORUN); 6 (APP, CLU, Herb. Faraoni, PORUN)

***Milium*** ***effusum*** L.

broadleaf forests

3 (Herb. Salerno); 6 (Herb. Cancellieri; HLUC, PORUN)

***Phleum*** ***hirsutum*** Honck. subsp. ***ambiguum*** (Ten.) Cif. & Giacom.

dry grasslands and garrigues

1 (HLUC); 5 (CLU); 7 (BI); 12 (MSNM)

***Phleum*** ***nodosum*** L.

[*Phleum* *bertolonii* DC.]

pastures

1 (Herb. Cancellieri); 5 (Herb. Cancellieri); 7 (BI); 10 (BI, GE; HLUC)

***Phleum*** ***subulatum*** (Savi) Asch. & Graebn. subsp. ***subulatum***

uncultivated lands and pastures

7 (HLUC)

***Poa*** ***bulbosa*** L. subsp. ***bulbosa***

uncultivated lands and pastures

1 (MSNM); 3 (Herb. Caruso, Herb. Cancellieri, PORUN); 5 (CLU) 6 (PORUN)

***Poa*** ***pratensis*** L. subsp. ***pratensis***

pastures

3 (CLU)

***Poa*** ***trivialis*** L. subsp. ***sylvicola*** (Guss.) H.Lindb.

along roads and trails

1 (Herb. Cancellieri)

***Polypogon*** ***monspeliensis*** (L.) Desf.

ruins

7 (Herb. Faraoni, HLUC, MSNM, PORUN)

***Polypogon*** ***viridis*** (Gouan) Breistr.

ruins

7 (PORUN)

***Rostraria*** ***cristata*** (L.) Tzvelev

ruins

7 (Herb. Cancellieri, HLUC); 8 (GE)

***Sesleria*** ***autumnalis*** (Scop.) F.W.Schultz

broadleaf forests

3 (Herb. Salerno); 8 (HLUC)

***Stipa*** ***austroitalica*** Martinovský

dry grasslands and garrigues

4a (APP, GE, Herb. Caruso, MSNM); 4c (CLU); 6 (BI, Herb. Faraoni, Herb. Cancellieri, PORUN); 9 (Herb. Cancellieri, HLUC, MSNM)

***Stipellula*** ***capensis*** (Thunb.) Röser & H.R.Hamasha

dry grasslands and garrigues

8 (GE, Herb. Salerno, HLUC, MSNM, PORUN)

***Taeniatherum*** ***asperum*** (Simonk.) Nevski

dry grasslands and garrigues

12 (APP, BI, CLU, GE, Herb. Caruso, Herb. Lattanzi, Herb. Lavezzo, HLUC, MSNM, PORUN, Herb. Soldano)

***Trachynia*** ***distachya*** (L.) Link

dry grasslands and garrigues

8 (Herb. Faraoni, Herb. Salerno)

***Triticum*** ***neglectum*** (Req. ex Bertol.) Greuter

[*Triticum* *ovatum* (L.) Raspail]

dry grasslands and garrigues, along trails

1 (BI, Herb. Cancellieri, HLUC, PORUN); 2 (MSNM); 4a (BI); 6 (PORUN); 8 (BI, GE, Herb. Salerno, MSNM); 10 (BI, Herb. Soldano); 12 (HLUC)

Ranunculaceae

***Anemone*** ***apennina*** L.

broadleaf forests

6 (HLUC)

***Anemone*** ***hortensis*** L. subsp. ***hortensis***

pastures

6 (HLUC)

***Clematis*** ***flammula*** L.

shrublands

9 (Herb. Caruso)

***Delphinium*** ***ajacis*** L.

[*Consolida* *ajacis* (L.) Schur]

arable lands

2 (HLUC)

***Eranthis*** ***hyemalis*** (L.) Salisb.

pastures

6 (HLUC)

***Ficaria*** ***verna*** Huds. subsp. ***fertilis*** (Lawalrée ex Laegaard) Stace

[*Ranunculus* *ficaria* L. subsp. *ficaria*]

pastures and shrublands

6 (HLUC)

E ***Helleborus*** ***viridis*** L. subsp. ***abruzzicus*** (M.Thomsen, McLewin & B.Mathew) Bartolucci, F.Conti, & Peruzzi

along roads and trails

1 (Herb. Cancellieri, HLUC); 2 (PORUN)

***Nigella*** ***damascena*** L.

uncultivated lands and pastures

7 (Herb. Cancellieri, HLUC); 9 (PORUN)

***Ranunculus*** ***acris*** L. subsp. ***acris***

wet meadows

5 (HLUC); 6 (CLU, TO, Herb. Lattanzi, Herb. Cancellieri, HLUC, PORUN)

***Ranunculus*** ***arvensis*** L.

crop fields and uncultivated lands, along trails

1 (BI, Herb. Salerno, HLUC)

***Ranunculus*** ***bulbosus*** L.

pastures

10 (Herb. Cancellieri)

***Ranunculus*** ***lanuginosus*** L.

broadleaf forests

3 (TO, Herb. Cancellieri, HLUC); 6 (TO)

***Ranunculus*** ***millefoliatus*** Vahl

pastures

3 (Herb. Cancellieri, HLUC); 4a (HLUC)

***Ranunculus*** ***monspeliacus*** L. subsp. ***monspeliacus***

pastures

1 (HLUC); 5 (APP, CLU. GE, Herb. Faraoni, Herb. Cancellieri, MSNM, PORUN); 6 (Herb. Lattanzi)

***Ranunculus*** ***neapolitanus*** Ten.

pastures

1 (TO); 3 (APP, MSNM); 5 (Herb. Faraoni); 6 (HLUC); 10 (Herb. Soldano)

***Ranunculus*** ***ophioglossifolius*** Vill.

wetlands

5 (HLUC); 6 (APP, CLU, GE, Herb. Faraoni, Herb. Caruso, Herb. Lattanzi, Herb. Cancellieri, Herb. Salerno, HLUC, MSNM, PORUN); 10 (APP, HLUC)

**CAM ***Ranunculus*** ***peltatus*** Schrank subsp. ***peltatus***

wetlands

6 (APP, TO, GE, MSNM)

***Ranunculus*** ***repens*** L.

wetlands

6 (CLU, TO, GE, Herb. Cancellieri)

***Ranunculus*** ***sardous*** Crantz

pastures

3 (APP); 10 (APP, TO, Herb. Cancellieri)

***Ranunculus*** ***trichophyllus*** Chaix subsp. ***trichophyllus***

wetlands

6 (APP, Herb. Faraoni, Herb. Caruso, Herb. Cancellieri, HLUC, PORUN)

***Thalictrum*** ***aquilegiifolium*** L. subsp. ***aquilegiifolium***

broadleaf forests and edges

6 (Herb. Faraoni, Herb. Caruso, Herb. Cancellieri, HLUC)

*BAS ***Thalictrum*** ***simplex*** L. subsp. ***simplex***

pastures and forest edges

3 (APP, PORUN); 6 (CLU, HLUC)

Papaveraceae

***Corydalis*** ***cava*** (L.) Schweigg. & Körte subsp. ***cava***

beech forests

4a (HLUC); 6 (HLUC)

***Fumaria*** ***officinalis*** L.

along trails

11 (CLU, GE)

A ***Papaver*** ***dubium*** L. subsp. ***dubium***

ruins

11 (CLU)

Crassulaceae

***Phedimus*** ***stellatus*** (L.) Raf.

dry grasslands and garrigues

5 (Herb. Lattanzi); 9 (Herb. Cancellieri, PORUN); 12 (APP)

***Sedum*** ***album*** L.

dry grasslands and garrigues

9 (Herb. Cancellieri, HLUC)

***Petrosedum*** ***tenuifolium*** (Sm.) Grulich

[*Sedum* *amplexicaule* DC. subsp. *tenuifolium* (Sm.) Greuter]

dry grasslands and garrigues

8 (HLUC); 12 (PORUN, Herb. Soldano)

***Sedum*** ***hispanicum*** L.

dry grasslands and garrigues

6 (PORUN); 7 (PORUN); 8 (Herb. Cancellieri, HLUC); 9 (Herb. Faraoni, Herb. Cancellieri, HLUC)

E ***Petrosedum*** ***ochroleucum*** (Chaix) Niederle subsp. ***mediterraneum*** (L.Gallo) Niederle

[*Sedum* *ochroleucum* Chaix subsp. *mediterraneum* L.Gallo]

dry grasslands and garrigues

1 (PORUN); 9 (Herb. Cancellieri, HLUC, PORUN)

***Sedum*** ***sexangulare*** L.

dry grasslands and garrigues

7 (PORUN); 9 (Herb. Faraoni, Herb. Cancellieri)

***Umbilicus*** ***rupestris*** (Salisb.) Dandy

ruins and shady rocks

7 (HLUC); 8 (GE, MSNM, PORUN)

Saxifragaceae

***Saxifraga*** ***bulbifera*** L.

pastures

3 (CLU, Herb. Faraoni, Herb. Caruso, Herb. Cancellieri, Herb. Salerno, HLUC, MSNM, PORUN); 6 (GE); 10 (HLUC); 12 (PORUN)

***Saxifraga*** ***granulata*** L. subsp. ***granulata***

pastures

4a (HLUC); 11 (HLUC)

***Saxifraga*** ***tridactylites*** L.

pastures

6 (Herb. Salerno); 7 (PORUN)

Vitaceae

***Vitis*** ***vinifera*** L.

broadleaf forests

8 (MSNM); 12 (MSNM)

Fabaceae

***Anthyllis*** ***vulneraria*** L. subsp. ***rubriflora*** (DC.) Arcang.

dry grasslands and garrigues

1 (HLUC); 3 (HLUC, PORUN); 4a (APP, Herb. Caruso, MSNM); 5 (MSNM); 6 (APP, PORUN); 9 (HLUC, MSNM); 12 (APP, MSNM)

***Astragalus*** ***glycyphyllos*** L.

broadleaf forests

1 (Herb. Faraoni, Herb. Cancellieri); 6 (Herb. Caruso)

***Astragalus*** ***hamosus*** L.

dry grasslands and garrigues

8 (Herb. Salerno, HLUC)

***Bituminaria*** ***bituminosa*** (L.) C.H.Stirt.

dry grasslands and garrigues

8 (Herb. Faraoni)

***Colutea*** ***arborescens*** L.

shrublands

12 (CLU)

***Coronilla*** ***scorpioides*** (L.) W.D.J.Koch

dry grasslands and garrigues

1 (Herb. Faraoni); 8 (Herb. Cancellieri, Herb. Salerno, PORUN)

***Cytisophyllum*** ***sessilifolium*** (L.) O.Lang

shrublands

2 (Herb. Caruso); 3 (Herb. Salerno)

***Cytisus*** ***spinescens*** C.Presl

dry grasslands and garrigues

4a (GE, Herb. Caruso); 5 (BI); 9 (BI, HLUC)

***Emerus*** ***major*** Mill. subsp. ***emeroides*** (Boiss. & Spruner) Soldano & F.Conti

broadleaf forests

8 (HLUC, MSNM, PORUN)

***Genista*** ***tinctoria*** L.

pastures and forest edges

5 (CLU, Herb. Faraoni, Herb. Cancellieri, Herb. Salerno); 6 (BI, CLU, GE, Herb. Caruso); 10 (CLU, GE, HLUC)

***Hippocrepis*** ***glauca*** Ten.

dry grasslands and garrigues

3 (HLUC); 5 (Herb. Soldano); 6 (Herb. Cancellieri); 9 (CLU, GE, Herb. Cancellieri, HLUC)

***Lathyrus*** ***aphaca*** L. subsp. ***aphaca***

pastures

1 (Herb. Salerno); 4a (HLUC); 5 (Herb. Faraoni)

***Lathyrus*** ***cicera*** L.

arable lands

1 (HLUC)

***Lathyrus*** ***grandiflorus*** Sm.

along trails

7 (Herb. Cancellieri, HLUC)

***Lathyrus*** ***hirsutus*** L.

wet meadows

5 (Herb. Lattanzi)

E ***Lathyrus*** ***jordanii*** (Ten.) Ces., Pass. & Gibelli

broadleaf forests

8 (Herb. Salerno)

***Lathyrus*** ***nissolia*** L.

pastures

3 (BI, CLU, GE, Herb. Faraoni, Herb. Caruso, Herb. Lattanzi, Herb. Cancellieri, Herb. Salerno, Herb. Lavezzo, MSNM, PORUN)

***Lathyrus*** ***pratensis*** L. subsp. ***pratensis***

along roads and trails

1 (Herb. Cancellieri); 5 (Herb. Salerno)

***Lathyrus*** ***sphaericus*** Retz.

pastures and forest edges

3 (Herb. Faraoni, Herb. Cancellieri, Herb. Salerno); 4a (HLUC); 6 (APP)

***Lathyrus*** ***sylvestris*** L. subsp. ***sylvestris***

shrublands

8 (Herb. Faraoni, HLUC)

***Lathyrus*** ***venetus*** (Mill.) Wohlf.

beech forests

3 (Herb. Cancellieri, HLUC); 5 (BI); 8 (CLU, MSNM)

***Lens*** ***nigricans*** (M.Bieb.) Godr.

dry grasslands and garrigues, along trails

5 (CLU); 12 (CLU, GE, HLUC, MSNM, PORUN)

***Lotus*** ***corniculatus*** L. subsp. ***corniculatus***

pastures

1 (HLUC); 3 (BI, Herb. Faraoni, Herb. Caruso, HLUC)

***Lotus*** ***herbaceus*** (Vill.) Jauzein

[*Dorycnium* *herbaceum* Vill.]

pastures and forest edges

12 (HLUC)

***Lotus*** ***ornithopodioides*** L.

dry grasslands and garrigues

8 (Herb. Salerno)

**BAS ***Lupinus*** ***albus*** L. subsp. ***graecus*** (Boiss. & Spruner) Franco & P.Silva

dry grasslands and garrigues

12 (APP, CLU, HLUC)

***Medicago*** ***lupulina*** L.

pastures and forest edges

1 (HLUC); 7 (Herb. Cancellieri, HLUC)

***Medicago*** ***minima*** (L.) L.

pastures and along trails

1 (Herb. Faraoni); 4a (CLU, MSNM); 5 (Herb. Faraoni, Herb. Cancellieri); 7 (Herb. Cancellieri, PORUN); 8 (Herb. Faraoni, Herb. Cancellieri, MSNM, PORUN); 9 (CLU, Herb. Salerno, HLUC)

***Medicago*** ***orbicularis*** (L.) Bartal.

along roads and trails

1 (Herb. Faraoni); 7 (Herb. Faraoni, Herb. Cancellieri, HLUC); 8 (Herb. Cancellieri)

***Medicago*** ***rigidula*** (L.) All.

along roads and trails

1 (Herb. Faraoni); 4a (HLUC); 7 (Herb. Faraoni)

***Melilotus*** ***indicus*** (L.) All.

ruins

7 (Herb. Faraoni)

***Melilotus*** ***neapolitanus*** Ten.

pastures and along trails

1 (Herb. Cancellieri, Herb. Salerno); 8 (CLU, Herb. Faraoni, Herb. Salerno, HLUC, MSNM, PORUN)

***Melilotus*** ***sulcatus*** Desf.

ruins

7 (Herb. Cancellieri, HLUC)

***Ononis*** ***pusilla*** L. subsp. ***pusilla***

dry grasslands and garrigues

5 (Herb. Salerno); 9 (CLU, Herb. Cancellieri, Herb. Salerno, HLUC)

***Ononis*** ***reclinata*** L.

dry grasslands and garrigues

5 (Herb. Lattanzi, Herb. Cancellieri); 6 (Herb. Salerno)

***Ornithopus*** ***compressus*** L.

dry grasslands and garrigues

8 (Herb. Cancellieri, HLUC); 12 (HLUC, MSNM)

***Scorpiurus*** ***subvillosus*** L.

dry grasslands and garrigues

8 (Herb. Cancellieri)

***Securigera*** ***varia*** (L.) Lassen

[*Coronilla* *varia* L.]

pastures

4a (Herb. Caruso); 5 (HLUC)

***Spartium*** ***junceum*** L.

shrublands

8 (Herb. Soldano)

***Trifolium*** ***angustifolium*** L. subsp. ***angustifolium***

pastures

8 (CLU, Herb. Cancellieri); 12 (CLU, HLUC, PORUN)

***Trifolium*** ***arvense*** L. subsp. ***arvense***

dry grasslands and garrigues

1 (HLUC); 5 (Herb. Salerno); 8 (HLUC); 11 (PORUN); 12 (HLUC)

***Trifolium*** ***bocconei*** Savi

dry grasslands and garrigues

12 (APP)

***Trifolium*** ***campestre*** Schreb.

dry grasslands and garrigues

8 (Herb. Cancellieri, PORUN); 12 (HLUC)

***Trifolium*** ***cherleri*** L.

dry grasslands and garrigues

8 (Herb. Cancellieri, HLUC); 12 (APP, CLU, GE)

***Trifolium*** ***dubium*** Sibth.

pastures

10 (CLU, GE)

***Trifolium*** ***echinatum*** M.Bieb.

wet meadows

10 (Herb. Cancellieri)

***Trifolium*** ***glomeratum*** L.

dry grasslands and garrigues

12 (CLU, HLUC)

***Trifolium*** ***incarnatum*** L. subsp. ***incarnatum***

arable lands

1 (Herb. Salerno)

***Trifolium*** ***incarnatum*** L. subsp. ***molinerii*** (Balb. ex Hornem.) Ces.

uncultivated lands and pastures

1 (Herb. Faraoni, Herb. Cancellieri); 5 (Herb. Lattanzi, Herb. Salerno); 10 (HLUC)

The correct identification of the *T. incarnatum* subspecies is often difficult and questionable, since there are frequent individuals remaining from past cultivation, mixed with individuals from natural population.

***Trifolium*** ***leucanthum*** M.Bieb.

uncultivated lands and pastures

1 (BI, Herb. Cancellieri, Herb. Salerno); 2 (Herb. Faraoni); 4a (CLU, GE)

***Trifolium*** ***micranthum*** Viv.

wet meadows

1 (HLUC); 6 (CLU); 10 (Herb. Cancellieri)

**CAM ***Trifolium*** ***phleoides*** Willd.

pastures

5 (Herb. Salerno, MSNM); 6 (Herb. Soldano)

***Trifolium*** ***pratense*** L. subsp. ***pratense***

pastures

6 (HLUC); 10 (Herb. Faraoni)

***Trifolium*** ***repens*** L.

pastures

7 (Herb. Faraoni)

***Trifolium*** ***scabrum*** L. subsp. ***scabrum***

dry grasslands and garrigues, along trails

5 (Herb. Cancellieri); 6 (BI, Herb. Salerno); 7 (CLU, Herb. Faraoni, Herb. Cancellieri, HLUC); 9 (Herb. Salerno, HLUC, PORUN)

***Trifolium*** ***squamosum*** L.

pastures

1 (HLUC, PORUN, Herb. Cancellieri, Herb. Salerno); 10 (CLU)

***Trifolium*** ***stellatum*** L.

uncultivated lands and pastures

1 (Herb. Cancellieri, Herb. Salerno, PORUN); 7 (HLUC); 11 (PORUN)

***Trifolium*** ***striatum*** L. subsp. ***tenuiflorum*** (Ten.) Arcang.

pastures

1 (Herb. Salerno); 5 (Herb. Cancellieri)

***Trifolium*** ***tenuifolium*** Ten.

dry grasslands and garrigues

12 (CLU, HLUC)

***Trifolium*** ***tomentosum*** L.

ruins

7 (Herb. Faraoni, Herb. Cancellieri, HLUC)

***Trigonella*** ***gladiata*** M.Bieb.

dry grasslands and garrigues

1 (Herb. Salerno, APP)

***Vicia*** ***angustifolia*** L.

[*Vicia* *sativa* L. subsp. *nigra* (L.) Ehrh.]

pastures

3 (MSNM); 10 (Herb. Faraoni)

***Vicia*** ***bithynica*** (L.) L.

uncultivated lands

1 (Herb. Faraoni)

***Vicia loiseleurii*** (M.Bieb.) Litv.

pastures and along trails

3 (Herb. Salerno); 4a (CLU); 8 (Herb. Cancellieri)

We referred to this species the samples previously identified as *Vicia disperma* DC. since the key reported in Flora d'Italia (Pignatti 1982) is misleading.

***Vicia*** ***grandiflora*** Scop.

broadleaf forests

2 (Herb. Faraoni, Herb. Cancellieri, HLUC); 10 (HLUC)

***Ervilia*** ***hirsuta*** (L.) Opiz

[*Vicia* *hirsuta* (L.) Gray]

pastures

3 (CLU, Herb. Faraoni, Herb. Cancellieri, MSNM); 5 (Herb. Salerno)

***Vicia*** ***incana*** Gouan

pastures

4c (CLU)

***Vicia*** ***lathyroides*** L.

pastures

3 (Herb. Salerno); 5 (Herb. Lattanzi)

*CAM ***Vicia*** ***serratifolia*** Jacq.

[*Vicia* *narbonensis* L. subsp. *serratifolia* (Jacq.) Ces.]

pastures

5 (CLU)

***Ervum*** ***gracile*** DC.[*Vicia parviflora* Cav.]

pastures

4a (CLU, GE); 5 (CLU, Herb. Faraoni, Herb. Cancellieri)

***Vicia*** ***pubescens*** (DC.) Link

along roads and trails

8 (CLU)

***Vicia*** ***sativa*** L.

pastures

1 (HLUC)

***Vicia*** ***sepium*** L.

beech forests

3 (Herb. Cancellieri); 6 (MSNM)

***Vicia*** ***villosa*** Roth subsp. ***varia*** (Host) Corb.

[*Vicia* *dasycarpa* Ten.]

uncultivated lands, pastures

4a (MSMN)

Polygalaceae

***Polygala*** ***major*** Jacq.

dry grasslands and garrigues

1 (Herb. Faraoni); 3 (Herb. Faraoni, Herb. Cancellieri, PORUN, GE, Herb. Caruso, Herb. Faraoni, Herb. Soldano)

***Polygala*** ***nicaeensis*** Risso ex W.D.J.Koch subsp. ***mediterranea*** Chodat

pastures

4a (APP)

Rhamnaceae

***Rhamnus*** ***alaternus*** L. subsp. ***alaternus***

shrublands

8 (Herb. Salerno); (9 (HLUC)

Rosaceae

***Amelanchier*** ***ovalis*** Medik. subsp. ***cretica*** (Willd.) Maire & Petitm.

beech forests

3 (Herb. Cancellieri, HLUC)

***Aphanes*** ***arvensis*** L.

pastures

3 (CLU)

***Aremonia*** ***agrimonoides*** (L.) DC. subsp. ***agrimonoides***

broadleaf forests

1 (Herb. Cancellieri); 3 (Herb. Faraoni, Herb. Cancellieri, HLUC)

***Crataegus*** ***monogyna*** Jacq.

shrublands

3 (CLU, Herb. Caruso, Herb. Cancellieri, HLUC, PORUN)

***Crataegus*** ×***media*** Bechst. nothovar. ***sicula*** (K.Koch) K.I.Chr.

shrublands

4a (APP, CLU, GE, Herb. Lattanzi, MSNM)

The specimens collected seems clearly referable to this unit but the morphology of the stipules, which have well-evident teeth, more or less with a similar shape, does not perfectly correspond to what is reported for this unit (Christensen 1992).

***Filipendula*** ***ulmaria*** (L.) Maxim.

wetlands

6 (Herb. Cancellieri, Herb. Salerno, HLUC)

***Filipendula*** ***vulgaris*** Moench

pastures

5 (HLUC); 6 (Herb. Salerno, HLUC, MSNM, PORUN); 10 (Herb. Faraoni, HLUC, PORUN)

***Fragaria*** ***vesca*** L. subsp. ***vesca***

broadleaf forests

3 (Herb. Faraoni, Herb. Cancellieri, HLUC, PORUN)

***Geum*** ***molle*** Vis. & Pančić

pastures and forest edges

1 (Herb. Salerno); 3 (APP, Herb. Salerno, MSNM); 4a (HLUC)

***Geum*** ***urbanum*** L.

broadleaf forests

1 (PORUN); 2 (Herb. Cancellieri, HLUC); 3 (APP, Herb. Faraoni, Herb. Cancellieri); 5 (Herb. Caruso); 6 (BI)

A ***Malus*** ***pumila*** Mill.

[*Malus* *domestica* (Borkh.) Borkh.]

broadleaf forests and shrublands

3 (GE, MSNM); 12 (CLU)

***Potentilla*** ***detommasii*** Ten.

pastures

1 (HLUC); 3 (APP, CLU, HLUC); 4a (CLU, GE, Herb. Caruso, MSNM); 5 (CLU, GE, Herb. Faraoni, Herb. Lattanzi, Herb. Cancellieri, MSNM, Herb. Soldano); 6 (HLUC); 11 (APP)

***Potentilla*** ***pedata*** Willd. ex Hornem.

dry grasslands and garrigues

1 (PORUN); 5 (Herb. Faraoni, HLUC); 6 (APP); 8 (CLU, PORUN); 10 (APP, CLU, GE, Herb. Faraoni, Herb. Lattanzi, Herb. Cancellieri, PORUN)

***Potentilla*** ***recta*** L. subsp. ***recta***

pastures

3 (BI, MSNM)

***Potentilla*** ***reptans*** L.

wetllands

4a (CLU); 5 (Herb. Faraoni)

E ***Potentilla*** ***rigoana*** Th.Wolf

pastures

3 (Herb. Salerno)

***Poterium*** ***sanguisorba*** L. subsp. ***balearicum*** (Bourg. ex Nyman) Stace

[*Sanguisorba* *minor* Scop. subsp. *balearica* (Bourg. ex Nyman) Muños Garm. & C.Navarro]

pastures

3 (Herb. Faraoni., Herb. Cancellieri, PORUN); 4a (MSNM); 5 (MSNM); 6 (APP); 7 (Herb. Cancellieri); 9 (MSNM); 11 (MSNM)

A ***Prunus*** ***dulcis*** (Mill.) D.A.Webb

wet meadows

9 (PORUN)

***Prunus*** ***spinosa*** L. subsp. ***spinosa***

shrublands

1 (Herb. Cancellieri)

***Pyrus*** ***communis*** L. subsp. ***pyraster*** (L.) Ehrh.

broadleaf forests

1 (Herb. Cancellieri, PORUN); 2 (Herb. Salerno); 3 (BI, Herb. Salerno, MSNM, PORUN); 6 (Herb. Salerno); 12 (GE, HLUC, MSNM)

***Pyrus*** ***spinosa*** Forssk.

pastures and shrublands

8 (PORUN); 12 (CLU, GE, Herb. Lavezzo, MSNM, BI)

***Rosa*** ***agrestis*** Savi

shrublands

7 (Herb. Lattanzi); 12 (CLU, Herb. Lattanzi, HLUC)

***Rosa*** ***andegavensis*** Bast.

shrublands

12 (Herb. Lattanzi)

***Rosa*** ***arvensis*** Huds.

forest edges

2 (HLUC); 8 (Herb. Soldano); 12 (Herb. Lattanzi)

***Rosa*** ***balsamica*** Besser

shrublands

2 (HLUC); 12 (Herb. Lattanzi)

***Rosa*** ***canina*** L.

shrublands

1 (Herb. Lattanzi, HLUC); 4a (Herb. Lattanzi); 7 (Herb. Lattanzi); 10 (Herb. Lattanzi)

***Rosa*** ***corymbifera*** Borkh.

shrublands

2 (Herb. Lattanzi); 4a (Herb. Lattanzi); 7 (Herb. Lattanzi)

**BAS ***Rosa*** ***inodora*** Fr.

shrublands

12 (Herb. Lattanzi)

**BAS, CAM ***Rosa*** ***mollis*** Sm.

shrublands

3 (CLU, Herb. Lattanzi, MSNM); 4a (CLU, Herb. Lattanzi); 6 (Herb. Lattanzi, Herb. Soldano)

***Rosa*** ***nitidula*** Besser

shrublands

10 (Herb. Lattanzi)

***Rosa*** ***squarrosa*** (A.Rau) Boreau

shrublands

3 (HLUC); 4b (Herb. Lattanzi); 10 (Herb. Lattanzi)

***Rosa*** ***subcanina*** (Christ) Vuk.

shrublands

1 (Herb. Lattanzi, HLUC); 4a (Herb. Lattanzi); 12 (Herb. Lattanzi)

***Rubus*** ***canescens*** DC.

shrublands

5 (Herb. Lattanzi); 8 (BI); 12 (Herb. Soldano)

***Rubus*** ***glandulosus*** Bellardi aggr.

shrublands

8 (CLU, Herb. Lattanzi)

**CAM ***Rubus*** ***incanescens*** (DC.) Bertol.

shrublands

5 (Herb. Lattanzi)

**CAM ***Sanguisorba*** ***officinalis*** L.

wet meadows

6 (HLUC, APP, Herb. Cancellieri, Herb. Salerno, MSNM)

***Sorbus*** ***aria*** (L.) Crantz subsp. ***cretica*** (Lindl.) Holmboe

shrublands

6 (PORUN)

***Sorbus*** ***domestica*** L.

broadleaf forests

8 (Herb. Salerno)

***Sorbus*** ***torminalis*** (L.) Crantz

broadleaf forests

8 (CLU, Herb. Salerno)

Urticaceae

***Parietaria*** ***judaica*** L.

ruins

7 (HLUC)

Betulaceae

***Alnus*** ***cordata*** (Loisel.) Duby

reforestation areas

3 (Herb. Salerno)

Probably planted for reforestation

***Alnus*** ***glutinosa*** (L.) Gaertn.

riparian forests

8 (Herb. Caruso)

***Betula*** ***pendula*** Roth

reforestation areas

3 (Herb. Salerno, HLUC, PORUN)

Probably planted for reforestation

***Carpinus*** ***betulus*** L.

broadleaf forests

8 (Herb. Salerno)

***Carpinus*** ***orientalis*** Mill. subsp. ***orientalis***

broadleaf forests

8 (BI, Herb. Caruso, Herb. Cancellieri, Herb. Salerno, MSNM); 12 (MSNM, PORUN)

***Ostrya*** ***carpinifolia*** Scop.

broadleaf forests

8 (Herb. Caruso, Herb. Cancellieri, Herb. Salerno)

Fagaceae

***Fagus*** ***sylvatica*** L. subsp. ***sylvatica***

broadleaf forests

3 (Herb. Caruso, PORUN)

***Quercus*** ***cerris*** L.

broadleaf forests

1 (Herb. Salerno); 3 (Herb. Salerno); 4c (GE)

***Quercus*** ***pubescens*** Willd. subsp. ***pubescens***

[incl. *Quercus* *virgiliana* Ten.]

broadleaf forests

8 (HLUC)

Cucurbitaceae

***Bryonia*** ***dioica*** Jacq.

shrublands

6 (Herb. Caruso)

Celastraceae

***Euonymus*** ***verrucosus*** Scop.

broadleaf forests

8 (APP, BI, GE, Herb. Cancellieri, Herb. Salerno, Herb. Lavezzo, HLUC, MSNM, PORUN)

Oxalidaceae

***Oxalis*** ***corniculata*** L.

ruins

7 (HLUC, PORUN)

Euphorbiaceae

***Euphorbia*** ***amygdaloides*** L.

broadleaf forests

3 (Herb. Cancellieri); 5 (Herb. Caruso); 8 (CLU, Herb. Caruso)

E ***Euphorbia*** ***corallioides*** L.

broadleaf forests

8 (MSNM)

***Euphorbia*** ***myrsinites*** L. subsp. ***myrsinites***

dry grasslands and garrigues

1 (Herb. Cancellieri, PORUN); 4a (HLUC); 5 (GE, MSNM, PORUN); 6 (HLUC)

***Mercurialis*** ***perennis*** L.

broadleaf forests

3 (PORUN); 5 (HLUC); 6 (BI, PORUN)

Hypericaceae

***Hypericum*** ***perfoliatum*** L.

broadleaf forests

8 (CLU)

***Hypericum*** ***perforatum*** L. subsp. ***veronense*** (Schrank) Ces.

dry grasslands and garrigues

1 (TO); 8 (APP, TO, Herb. Soldano)

Linaceae

***Linum*** ***bienne*** Mill.

dry grasslands and garrigues

4a (CLU, GE, MSNM); 6 (Herb. Faraoni, Herb. Cancellieri)

***Linum*** ***catharticum*** L. subsp. ***catharticum***

pastures

3 (Herb. Cancellieri, Herb. Salerno); 6 (GE, Herb. Lattanzi)

***Linum*** ***corymbulosum*** Rchb.

dry grasslands and garrigues

1 (Herb. Salerno); 8 (Herb. Faraoni, Herb. Cancellieri); 12 (APP)

***Linum*** ***strictum*** L.

[*Linum* *strictum* L. subsp. *spicatum* (Pers.) Nyman]

dry grasslands and garrigues

9 (Herb. Faraoni, MSNM)

***Linum*** ***tenuifolium*** L.

dry grasslands and garrigues

4a (BI, CLU, GE, Herb. Caruso, MSNM); 5 (Herb. Faraoni, Herb. Cancellieri, MSNM, PORUN); 6 (Herb. Salerno, Herb. Soldano); 9 (Herb. Cancellieri)

***Linum*** ***tommasinii*** (Rchb.) Nyman

dry grasslands and garrigues

5 (CLU, Herb. Lattanzi); 4c (APP, GE, MSNM); 6 (Herb. Lavezzo)

***Linum*** ***trigynum*** L.

dry grasslands and garrigues

12 (MSNM)

Salicaceae

***Populus*** ***tremula*** L.

broadleaf forests

3 (Herb. Salerno, PORUN); 4a (Herb. Caruso); 6 (Herb. Cancellieri)

***Salix*** ***apennina*** A.K.Skvortsov

shrublands

5 (MSNM, Herb. Soldano); 6 (Herb. Salerno, HLUC)

***Salix*** ***eleagnos*** Scop.

shrublands

5 (MSNM); 6 (HLUC, PORUN)

***Salix*** ***purpurea*** L. subsp. ***purpurea***

shrublands

5 (MSNM); 6 (Herb. Salerno, HLUC)

Violaceae

***Viola*** ***alba*** Besser subsp. ***dehnhardtii*** (Ten.) W.Becker

broadleaf forests

8 (CLU)

E ***Viola*** ***aethnensis*** (DC.) Strobl subsp. ***splendida*** (W.Becker) Merxm. & Lippert

pastures, edges

9 (HLUC)

***Viola*** ***arvensis*** Murray

uncultivated lands

1 (HLUC, Herb. Salerno); 2 (PORUN); 5 (CLU); 6 (HLUC, APP, GE, MSNM, Herb. Lattanzi, Herb. Salerno)

**BAS, E ***Viola*** ***eugeniae*** Parl. subsp. ***eugeniae***

pastures

3 (Herb. Faraoni, Herb. Cancellieri); 5 (HLUC)

E ***Viola*** ***pseudogracilis*** Strobl subsp. ***pseudogracilis***

pastures

1 (HLUC); 3 (APP, GE, Herb. Faraoni, Herb. Lattanzi, Herb. Lavezzo, HLUC, MSNM); 6 (Herb. Faraoni, Herb. Lattanzi)

***Viola*** ***reichenbachiana*** Jord. ex Boreau

broadleaf forests

1 (HLUC); 3 (Herb. Cancellieri, HLUC); 8 (HLUC)

Geraniaceae

***Erodium*** ***acaule*** (L.) Bech. & Thell.

pastures and forest edges

6 (HLUC)

***Erodium*** ***ciconium*** (L.) L'Hér.

pastures

11 (PORUN)

***Erodium*** ***cicutarium*** (L.) L'Hér.

pastures

11 (HLUC)

***Erodium*** ***malacoides*** (L.) L'Hér. subsp. ***malacoides***

pastures

11 (HLUC)

***Geranium*** ***columbinum*** L.

ruins and rocks

1 (PORUN); 5 (Herb. Salerno); 6 (TO); 8 (TO)

***Geranium*** ***dissectum*** L.

ruins and rocks

1 (Herb. Cancellieri)

***Geranium*** ***lucidum*** L.

pastures

1 (PORUN); 5 (TO); 6 (TO)

***Geranium*** ***molle*** L.

pastures and forest edges

1 (TO); 3 (Herb. Salerno, HLUC); 6 (TO)

***Geranium*** ***purpureum*** Vill.

along trails

3 (PORUN)

***Geranium*** ***pusillum*** L.

along trails

5 (TO)

***Geranium*** ***pyrenaicum*** Burm.f. subsp. ***pyrenaicum***

along trails and shrublands

3 (APP, TO); 5 (TO, Herb. Cancellieri); 6 (Herb. Cancellieri, HLUC)

***Geranium*** ***robertianum*** L.

broadleaf forests

3 (Herb. Salerno, HLUC); 7 (TO); 8 (TO)

***Geranium*** ***sanguineum*** L.

along trails and shrublands

1 (TO, Herb. Faraoni, PORUN); 3 (APP, Herb. Caruso, Herb. Salerno, MSNM, PORUN); 5 (Herb. Cancellieri)

***Geranium*** ***versicolor*** L.

broadleaf forests

1 (Herb. Cancellieri); 2 (TO); 3 (APP, Herb. Faraoni); 6 (PORUN); 8 (MSNM)

Staphyleaceae

***Staphylea*** ***pinnata*** L.

broadleaf forests

8 (PORUN)

Anacardiaceae

***Pistacia*** ***terebinthus*** L. subsp. ***terebinthus***

shrublands

1 (HLUC); 8 (Herb. Salerno)

Sapindaceae

***Acer*** ***campestre*** L.

broadleaf forests and shrublands

1 (Herb. Salerno, PORUN)

***Acer*** ***monspessulanum*** L. subsp. ***monspessulanum***

broadleaf forests

1 (Herb. Salerno, PORUN); 8 (Herb. Salerno)

***Acer*** ***opalus*** Mill. subsp. ***obtusatum*** (Waldst. & Kit. ex Willd.) Gams

[incl. *Acer* *neapolitanum* Ten.]

broadleaf forests

4a (GE); 6 (HLUC); 8 (CLU, Herb. Salerno, HLUC, PORUN)

***Acer*** ***pseudoplatanus*** L.

broadleaf forests

6 (PORUN); 8 (GE)

***Acer*** ×***coriaceum*** Bosc ex Tausch.

broadleaf forests

8 (Herb. Cancellieri, Herb. Salerno)

According to the treatment of the genus *Acer* in Flora Iberica (Castroviejo 2015), the name *Acer* ×*coriaceum* should be applied to the hybrid *Acer monspessulanum* L. subsp. *monspessulanum* × A. *opalus* Mill. subsp. *obtusatum,* on the contrary the name *Acer* ×*peronai* Schwer should be applied to the hybrid *Acer monspessulanum* L. subsp. m*onspessulanum* × A. *opalus* Mill. subsp. *opalus.*

Cistaceae

***Cistus*** ***creticus*** L. subsp. ***eriocephalus*** (Viv.) Greuter & Burdet

dry grasslands and garrigues

12 (APP)

***Fumana*** ***procumbens*** (Dunal) Gren. & Godr.

dry grasslands and garrigues

4a (Herb. Caruso)

***Helianthemum*** ***apenninum*** (L.) Mill. subsp. ***apenninum***

dry grasslands and garrigues

4a (GE, MSNM); 6 (BI, Herb. Cancellieri, PORUN); 9 (Herb. Caruso, Herb. Cancellieri, HLUC)

***Helianthemum*** ***nummularium*** (L.) Mill. subsp. ***obscurum*** (Čelak.) Holub

dry grasslands and garrigues

3 (Herb. Faraoni, Herb. Cancellieri); 4a (Herb. Caruso); 5 (MSNM); (6 (HLUC, GE)

***Helianthemum*** ***oelandicum*** (L.) Dum.Cours. subsp. ***incanum*** (Willk.) G.López

dry grasslands and garrigues

3 (Herb. Faraoni, Herb. Cancellieri, HLUC); 4a (GE, Herb. Caruso, MSNM); 5 (MSNM, Herb. Caruso, Herb. Cancellieri); 6 (GE, Herb. Cancellieri, HLUC, PORUN)

***Helianthemum*** ***salicifolium*** (L.) Mill.

dry grasslands and garrigues

5 (Herb. Lattanzi, Herb. Cancellieri, Herb. Salerno)

***Tuberaria*** ***guttata*** (L.) Fourr.

dry grasslands and garrigues

12 (APP)

Malvaceae

***Althaea*** ***cannabina*** L.

along roads and trails

7 (Herb. Cancellieri, HLUC)

***Althaea*** ***officinalis*** L.

wet meadows

5 (APP, Herb. Lattanzi, HLUC)

***Malva*** ***moschata*** L.

pastures

5 (HLUC)

***Malva*** ***setigera*** Schimp. & Spenn.

[*Althaea* *hirsuta* L.]

arable lands

1 (Herb. Salerno, HLUC)

***Malva*** ***sylvestris*** L.

along roads and trails

1 (HLUC); 7 (Herb. Cancellieri)

***Malva*** ***thuringiaca*** (L.) Vis.

[*Lavatera* *thuringiaca* L. subsp. *ambigua* (DC.) Nyman]

forest edges

5 (HLUC)

***Tilia*** ***platyphyllos*** Scop. subsp. ***cordifolia*** (Besser) C.K.Schneid.

broadleaf forests

8 (GE, MSNM)

Thymelaeaceae

***Daphne*** ***laureola*** L.

broadleaf forests

3 (Herb. Caruso, Herb. Cancellieri, HLUC); 5 (MSNM)

Brassicaceae

***Aethionema*** ***saxatile*** (L.) R.Br. subsp. ***saxatile***

dry grasslands and garrigues

3 (Herb. Cancellieri, HLUC, PORUN); 4a (BI); 5 (GE, MSNM, PORUN, Herb. Soldano); 6 (Herb. Faraoni, HLUC)

***Alliaria*** ***petiolata*** (M.Bieb.) Cavara & Grande

broadleaf forests

1 (Herb. Salerno)

***Alyssum*** ***alyssoides*** (L.) L.

dry grasslands and garrigues

1 (Herb. Cancellieri); 5 (CLU, Herb. Salerno)

E ***Alyssum*** ***diffusum*** Ten. subsp. ***calabricum*** Španiel, Marhold, N.G.Passal. & Lihová

dry grasslands and garrigues

1 (HLUC); 5 (APP, CLU, GE, Herb. Caruso, Herb. Cancellieri, Herb. Salerno, MSNM, PORUN)

***Alyssum*** ***simplex*** Rudolphi

[*Alyssum* *campestre* auct. Fl. Ital.]

dry grasslands and garrigues

7 (HLUC)

***Arabidopsis*** ***thaliana*** (L.) Heynh.

dry grasslands and garrigues

5 (Herb. Salerno); 7 (PORUN); 10 (HLUC); 11 (BI); 12 (PORUN)

***Arabis*** ***collina*** Ten. subsp. ***collina***

dry grasslands and garrigues

4a (BI, MSNM); 6 (HLUC, MSNM); 7 (HLUC); 8 (MSNM)

***Arabis*** ***hirsuta*** (L.) Scop.

dry grasslands and garrigues

9 (HLUC)

***Arabis*** ***sagittata*** (Bertol.) DC.

broadleaf forests

3 (PORUN); 5 (Herb. Cancellieri, MSNM)

***Aurinia*** ***saxatilis*** (L.) Desv. subsp. ***megalocarpa*** (Hausskn.) T.R.Dudley

dry grasslands and garrigues

1 (Herb. Faraoni, Herb. Cancellieri, Herb. Salerno, HLUC, PORUN); 7 (Herb. Cancellieri, HLUC); 8 (Herb. Soldano)

***Barbarea*** ***bracteosa*** Guss.

pastures

3 (APP, HLUC)

***Barbarea*** ***vulgaris*** R.Br. subsp. ***vulgaris***

pastures

1 (HLUC); 5 (APP); 10 (HLUC); 12 (APP)

***Biscutella*** ***didyma*** L. subsp. ***apula*** Nyman

dry grasslands and garrigues

3 (HLUC); 5 (APP); 7 (HLUC); 8 (APP, Herb. Cancellieri); 12 (MSNM)

***Biscutella*** ***laevigata*** L. subsp. ***laevigata***

dry grasslands and garrigues

1 (PORUN); 2 (PORUN)

***Capsella*** ***rubella*** Reut.

dry grasslands and garrigues

11 (HLUC)

*BAS ***Cardamine*** ***amporitana*** Sennen & Pau

wetllands

12 (APP, Herb. Soldano)

***Cardamine*** ***bulbifera*** (L.) Crantz

broadleaf forests

3 (PORUN); 6 (HLUC)

***Cardamine*** ***chelidonia*** L.

broadleaf forests

3 (Herb. Cancellieri); 6 (BI); 8 (APP, CLU, Herb. Faraoni, Herb. Caruso, Herb. Cancellieri, HLUC, MSNM, PORUN); 9 (HLUC)

***Cardamine*** ***graeca*** L.

broadleaf forests

1 (HLUC); 2 (Herb. Cancellieri, Herb. Salerno, HLUC); 8 (Herb. Cancellieri); 12 (PORUN, Herb. Soldano)

***Cardamine*** ***hirsuta*** L.

along roads and trails

6 (HLUC)

***Clypeola*** ***jonthlaspi*** L.

dry grasslands and garrigues

9 (HLUC); 11 (HLUC)

***Descurainia*** ***sophia*** (L.) Webb ex Prantl

forest edges

11 (PORUN)

***Drabella muralis*** (L.) Fourr.

[*Draba* *muralis* L.]

dry grasslands and garrigues

5 (Herb. Salerno)

E ***Erysimum*** ***apenninum*** Peccenini & Polatschek

pastures and forest edges

1 (HLUC, Herb. Cancellieri, Herb. Lavezzo); 4a (APP, GE); 4c (CLU)

Samples from Apennines sector, until now attributed with difficulty to *Erysimum pseudorhaeticum*, Polatschek, should be attributed to this recently described unit, distributed from Abruzzo to northern Calabria (Peccenini & Polatschek 2016).

***Hesperis*** ***laciniata*** All. subsp. ***laciniata***

along trails

9 (HLUC); 11 (APP, GE, MSNM)

***Hesperis*** ***matronalis*** L. subsp. ***matronalis***

broadleaf forests

1 (HLUC); 5 (BI); 6 (APP, GE, HLUC)

***Hornungia*** ***petraea*** (L.) Rchb. subsp. ***petraea***

dry grasslands and garrigues

9 (HLUC)

**BAS ***Iberis*** ***umbellata*** L.

dry grasslands and garrigues

9 (HLUC, GE, Herb. Lattanzi)

***Iberis*** ***violacea*** R.Br.

[*Iberis* *carnosa* Willd. subsp. *carnosa*]

dry grasslands and garrigues

1 (HLUC); 5 (Herb. Lattanzi, Herb. Cancellieri, Herb. Salerno, PORUN); 9 (Herb. Caruso, APP, BI, Herb. Faraoni, Herb. Cancellieri, Herb. Lavezzo, HLUC, MSNM, PORUN)

A ***Isatis*** ***tinctoria*** L. subsp. ***tinctoria***

pastures

11 (PORUN)

***Lepidium*** ***draba*** L. subsp. ***draba***

along roads and trails

8 (Herb. Cancellieri)

***Microthlaspi*** ***perfoliatum*** (L.) F.K.Mey.

[*Thlaspi* *perfoliatum* L.]

pastures

9 (HLUC); 11 (HLUC)

***Myagrum*** ***perfoliatum*** L.

arable lands

1 (MSNM)

***Nasturtium*** ***officinale*** R.Br.

wetlands

12 (APP, Herb. Soldano)

***Noccaea*** ***praecox*** (Wulfen) F.K.Mey.

[*Thlaspi* *praecox* Wulfen]

pastures

9 (Herb. Salerno, HLUC)

***Pseudoturritis*** ***turrita*** (L.) Al-Shehbaz

[*Arabis* *turrita* L.]

broadleaf forests

3 (HLUC); 8 (PORUN)

***Rapistrum*** ***rugosum*** (L.) All.

crop fields and uncultivated lands, along trails

1 (Herb. Salerno); 4a (HLUC); 10 (GE, MSNM)

***Rorippa*** ***sylvestris*** (L.) Besser subsp. ***sylvestris***

wet meadows

1 (HLUC); 5 (APP)

***Sisymbrium*** ***officinale*** (L.) Scop.

uncultivated lands

1 (HLUC)

***Thlaspi*** ***alliaceum*** L.

arable lands

1 (Herb. Salerno)

***Thlaspi*** ***arvense*** L.

pastures

4a (Herb. Caruso)

Resedaceae

***Reseda*** ***lutea*** L. subsp. ***lutea***

crop fields and uncultivated lands, along trails

1 (HLUC); 4a (BI); 4c (CLU); 7 (Herb. Cancellieri); 9 (Herb. Salerno, HLUC, PORUN)

Santalaceae

***Thesium*** ***humifusum*** DC.

dry grasslands and garrigues

1 (HLUC); 5 (CLU, Herb. Faraoni, MSNM)

Caryophyllaceae

A ***Agrostemma githago*** L.

arable lands

1 (BI, Herb. Salerno, HLUC)

***Arenaria*** ***leptoclados*** (Rchb.) Guss. subsp. ***leptoclados***

ruins

7 (Herb. Cancellieri)

***Arenaria*** ***serpyllifolia*** L. subsp. ***serpyllifolia***

dry grasslands and garrigues

1 (Herb. Cancellieri); 4c (MSNM); 6 (Herb. Salerno); 7 (CLU, PORUN)

***Cerastium*** ***brachypetalum*** Desp. ex Pers. subsp. ***roeseri*** (Boiss. & Heldr.) Nyman

dry grasslands and garrigues

12 (CLU)

***Cerastium*** ***glomeratum*** Thuill.

pastures

3 (CLU, MSNM)

***Cerastium*** ***glutinosum*** Fr.

pastures

7 (HLUC)

***Cerastium*** ***holosteoides*** Fr.

[incl. *Cerastium* *holosteoides* Fr. subsp. *triviale* (Link) Moschl]

pastures

3 (Herb. Caruso, MSNM); 6 (Herb. Lattanzi); 9 (HLUC)

***Cerastium*** ***pumilum*** Curtis

pastures

3 (BI, Herb. Salerno); 7 (HLUC)

***Cerastium*** ***semidecandrum*** L.

pastures

3 (CLU, HLUC, MSNM); 6 (Herb. Lattanzi); 7 (HLUC); 9 (HLUC)

E ***Cerastium*** ***tomentosum*** L.

dry grasslands and garrigues

1 (HLUC, PORUN); 5 (APP, BI, Herb. Caruso)

E ***Dianthus*** ***carthusianorum*** L. subsp. ***tenorei*** (Lacaita) Pignatti

pastures and forest edges

3 (Herb. Salerno, HLUC); 6 (APP, CLU, Herb. Faraoni, Herb. Lattanzi, Herb. Cancellieri, PORUN)

***Herniaria*** ***hirsuta*** L. subsp. ***hirsuta***

along trails

6 (APP)

***Moehringia*** ***pentandra*** Gay

along roads and trails

8 (MSNM, APP)

***Moehringia*** ***trinervia*** (L.) Clairv.

beech forests

3 (APP, Herb. Cancellieri, Herb. Salerno)

***Petrorhagia*** ***dubia*** (Raf.) G.López & Romo

pastures

5 (Herb. Cancellieri); 10 (GE, Herb. Faraoni, Herb. Cancellieri, HLUC, PORUN)

***Petrorhagia*** ***prolifera*** (L.) P.W.Ball & Heywood

pastures

1 (Herb. Salerno); 5 (Herb. Lattanzi); 10 (Herb. Salerno)

***Petrorhagia*** ***saxifraga*** (L.) Link subsp. ***saxifraga***

dry grasslands and garrigues

7 (HLUC); 9 (HLUC)

***Polycarpon*** ***tetraphyllum*** (L.) L. subsp. ***diphyllum*** (Cav.) O.Bolòs & Font Quer

ruins

7 (Herb. Cancellieri)

*CAM ***Sabulina*** ***glaucina*** (Dvořáková) Dillenb. & Kadereit

[*Minuartia* *verna* (L.) Hiern subsp. *collina* (Neilr.) Domin]

dry grasslands and garrigues, along trails

5 (CLU); 3 (Herb. Cancellieri, Herb. Lavezzo, HLUC, MSNM); 7 (HLUC); 9 (HLUC)

We referred to this species all the collected plants, although some characters (size of inflorescences and petals sometimes little or nothing protruding beyond the sepals) seem to similar to those indicated for *Sabulina attica* (Boiss. & Sprun.) Dillenb. & Kadereit[≡ *M. verna* subsp. *attica* (Boiss. & Spruner) Graebn.]

***Sabulina*** ***mediterranea*** (Ledeb. ex Link) Rchb.

[*Minuartia* *mediterranea* (Link) K.Malý]

ruins

7 (Herb. Cancellieri, MSNM)

***Sagina*** ***apetala*** Ard. subsp. ***apetala***

ruins

7 (Herb. Cancellieri)

***Silene*** ***catholica*** (L.) W.T.Aiton

dry grasslands and garrigues

8 (HLUC)

***Silene*** ***conica*** L.

dry grasslands and garrigues

1 (Herb. Salerno, HLUC); 4a (GE, Herb. Caruso, Herb. Lattanzi ); 5 (CLU, Herb. Lattanzi, Herb. Cancellieri, HLUC); 6 (CLU, Herb. Salerno, PORUN)

***Silene*** ***coronaria*** (L.) Clairv.

broadleaf forests

8 (BI)

***Silene*** ***flos-cuculi*** (L.) Clairv.

pastures

6 (BI, CLU, Herb. Faraoni, Herb. Cancellieri, PORUN, Herb. Caruso, Herb. Salerno, HLUC); 10 (PORUN)

***Silene*** ***gallica*** L.

pastures

5 (APP); 12 (CLU)

***Silene*** ***italica*** (L.) Pers. subsp. ***italica***

broadleaf forests and edges

3 (Herb. Faraoni, Herb. Cancellieri); 5 (Herb. Cancellieri); 8 (PORUN)

**CAM, E ***Silene*** ***italica*** (L.) Pers. subsp. ***sicula*** (Ucria) Jeanm.

broadleaf forests and edges

3 (HLUC, PORUN); 4a (Herb. Lattanzi); 4c (Herb. Caruso); 5 (MSNM)

The correct identification of subspecies of *S. italica* in Campania and Basilicata regionis often a difficult topic; the presence in the same area of different subspecies suggest that their taxonomic status should be reconsidered.

***Silene*** ***latifolia*** Poir.

broadleaf forests and edges

1 (Herb. Cancellieri); 3 (HLUC); 5 (HLUC)

***Silene*** ***otites*** (L.) Wibel subsp. ***otites***

pastures

9 (CLU, Herb. Salerno, HLUC, PORUN)

***Silene*** ***pendula*** L.

pastures

9 (CLU)

***Silene*** ***viridiflora*** L.

broadleaf forests

8 (BI, Herb. Faraoni, Herb. Cancellieri, HLUC, PORUN)

***Silene*** ***vulgaris*** (Moench) Garcke subsp. ***tenoreana*** (Colla) Soldano & F.Conti

forest edges

8 (Herb. Faraoni)

***Stellaria*** ***neglecta*** Weihe

pastures

6 (MSNM)

Plumbaginaceae

E ***Armeria*** ***macropoda*** Boiss.

pastures

1 (HLUC, PORUN)

***Plumbago*** ***europaea*** L.

along roads and trails

8 (Herb. Salerno)

Polygonaceae

***Rumex*** ***acetosa*** L. subsp. ***acetosa***

pastures

3 (APP, CLU, Herb. Faraoni, Herb. Caruso); 6 (Herb. Cancellieri)

***Rumex*** ***conglomeratus*** Murray

pastures

6 (MSNM)

***Rumex*** ***nebroides*** Campd.

pastures

3 (Herb. Lavezzo, HLUC, MSNM, PORUN); 6 (HLUC, MSNM)

***Rumex*** ***pulcher*** L. subsp. ***pulcher***

dry grasslands and garrigues

8 (MSNM); 12 (CLU)

Cornaceae

***Cornus*** ***mas*** L.

broadleaf forests

4c (BI, CLU); 8 (BI, Herb. Salerno, HLUC)

Ericaceae

***Orthilia*** ***secunda*** (L.) House

beech forests

3 (Herb. Cancellieri, Herb. Salerno, HLUC, PORUN)

Primulaceae

***Lysimachia*** ***linum-stellatum*** L.

[*Asterolinon* *linum-stellatum* (L.) Duby]

dry grasslands and garrigues

5 (Herb. Faraoni, Herb. Cancellieri, Herb. Salerno)

***Samolus*** ***valerandi*** L.

wetllands, spring

8 (Herb. Faraoni, Herb. Salerno, HLUC, MSNM, PORUN)

Apocynaceae

***Vinca*** ***major*** L. subsp. ***major***

broadleaf forests

8 (CLU, Herb. Caruso, PORUN, HLUC)

Gentianaceae

**BAS ***Blackstonia*** ***acuminata*** (W.D.J.Koch & Ziz) Domin subsp. ***aestiva*** (K.Malý) Zeltner

dry grasslands and garrigues

9 (APP, Herb. Faraoni)

***Blackstonia*** ***perfoliata*** (L.) Huds. subsp. ***perfoliata***

pastures

8 (HLUC, MSNM); 9 (MSNM)

***Centaurium*** ***erythraea*** Rafn subsp. ***erythraea***

dry grasslands and garrigues

9 (APP, GE, Herb. Faraoni, Herb. Lattanzi, PORUN, MSNM)

***Centaurium*** ***maritimum*** (L.) Fritsch

dry grasslands and garrigues

10 (PORUN); 11 (GE)

Rubiaceae

***Asperula*** ***taurina*** L. subsp. ***taurina***

broadleaf forests

6 (APP, BI, Herb. Faraoni, Herb. Caruso, Herb. Cancellieri, Herb. Salerno, HLUC, PORUN)

***Crucianella*** ***angustifolia*** L.

dry grasslands and garrigues

8 (BI, GE, Herb. Faraoni, Herb. Salerno, MSNM, PORUN); 12 (APP, CLU, Herb. Lattanzi, HLUC, MSNM, PORUN)

***Cruciata*** ***laevipes*** Opiz

pastures

3 (BI, GE, Herb. Faraoni, Herb. Caruso, HLUC, PORUN)

***Cruciata*** ***pedemontana*** (Bellardi) Ehrend.

pastures

3 (APP, GE, Herb. Salerno); 5 (Herb. Salerno)

***Galium*** ***corrudifolium*** Vill.

dry grasslands and garrigues

4a (APP); 5 (APP, CLU, GE, MSNM); 6 (PORUN); 7 (Herb. Cancellieri); 8 (APP, CLU); 9 (MSNM); 12 (APP)

***Galium*** ***debile*** Desv.

wetlands

1 (HLUC); 5 (HLUC); 6 (APP, CLU, GE, Herb. Lattanzi, Herb. Cancellieri, MSNM); 10 (CLU, Herb. Cancellieri, MSNM)

***Galium*** ***mollugo*** L. subsp. ***erectum*** Syme

along roads and trails

7 (HLUC); 8 (Herb. Cancellieri)

***Galium odoratum***(L.) Scop.

beech forests

3 (Herb. Cancellieri, HLUC, PORUN)

***Galium*** ***verum*** L.

pastures

5 (HLUC)

***Rubia*** ***peregrina*** L.

shrublands

8 (Herb. Caruso)

***Sherardia*** ***arvensis*** L.

pastures

4a (HLUC)

Boraginaceae

***Anchusella*** ***cretica*** (Mill.) Bigazzi, E.Nardi & Selvi

pastures and uncultivated lands

1 (Herb. Salerno); 5 (GE, Herb. Faraoni, Herb. Caruso, Herb. Salerno, HLUC, MSNM); 6 (HLUC)

***Cerinthe*** ***minor*** L. subsp. ***auriculata*** (Ten.) Domac

beech forests

3 (HLUC, PORUN); 6 (APP, GE, MSNM)

***Cynoglossum*** ***creticum*** Mill.

pastures

4a (CLU)

***Echium*** ***italicum*** L. subsp. ***italicum***

forest edges

5 (TO); 7 (PORUN)

***Echium*** ***plantagineum*** L.

arable lands

1 (HLUC)

***Echium*** ***vulgare*** L. subsp. ***vulgare***

pastures and uncultivated lands

4a (MSNM); 11 (CLU)

***Myosotis arvensis*** (L.) Hill subsp. ***arvensis***

dry grasslands and garrigues

2 (PORUN)

***Myosotis*** ***discolor*** Pers. subsp. ***discolor***

pastures

6 (CLU, GE)

***Myosotis*** ***incrassata*** Guss.

arable lands

1 (HLUC)

*CAM ***Myosotis*** ***nemorosa*** Besser

wet meadows

6 (APP, CLU, GE, Herb. Faraoni, Herb. Lattanzi, Herb. Cancellieri, Herb. Lavezzo, HLUC, PORUN)

***Myosotis*** ***ramosissima*** Rochel subsp. ***ramosissima***

pastures and uncultivated lands

1 (Herb. Salerno); 3 (Herb. Salerno); 5 (APP); 10 (Herb. Salerno)

E ***Myosotis*** ***sylvatica*** Hoffm. subsp. ***elongata*** (Strobl) Grau

broadleaf forests

3 (APP, Herb. Faraoni, Herb. Cancellieri, HLUC); 6 (CLU, Herb. Cancellieri)

E ***Onosma*** ***echioides*** (L.) L. subsp. ***echioides***

dry grasslands and garrigues

5 (APP, BI, CLU, GE, Herb. Faraoni, Herb. Caruso, Herb. Lattanzi, Herb. Cancellieri, HLUC, MSNM, PORUN); 9 (APP, Herb. Cancellieri, Herb. Salerno, Herb. Soldano, HLUC, MSNM)

Convolvulaceae

***Convolvulus*** ***cantabrica*** L.

dry grasslands and garrigues

1 (Herb. Faraoni, PORUN); 8 (Herb. Cancellieri, PORUN); 9 (HLUC)

***Convolvulus*** ***silvaticus*** Kit.

[*Calystegia* *silvatica* (Kit.) Griseb.]

shrublands

8 (HLUC)

Solanaceae

***Solanum*** ***dulcamara*** L.

shrublands

7 (Herb. Cancellieri)

Lamiaceae

***Ajuga*** ***chamaepitys*** (L.) Schreb. subsp. ***chamaepitys***

dry grasslands and garrigues

5 (Herb. Lattanzi); 7 (CLU)

***Ajuga*** ***reptans*** L.

broadleaf forests and wet pastures

3 (Herb. Caruso, PORUN); 6 (BI, Herb. Faraoni, Herb. Caruso, Herb. Cancellieri, HLUC, PORUN)

***Betonica*** ***officinalis*** L.

[*Stachys* *officinalis* L. *officinalis*]

broadleaf forests

5 (HLUC)

***Clinopodium*** ***alpinum*** (L.) Merino subsp. ***meridionale*** (Nyman) Govaerts

[*Acinos* *alpinus* (L.) Moench subsp. *meridionalis* (Nyman) P.W. Ball]

dry grasslands and garrigues

1 (HLUC, PORUN); 3 (Herb. Cancellieri, PORUN); 4a (CLU, Herb. Caruso); 6 (BI, Herb. Faraoni)

***Clinopodium*** ***nepeta*** (L.) Kuntze subsp. ***nepeta***

[*Calamintha* *nepeta* (L.) Savi subsp. *nepeta*]

pastures

3 (PORUN)

***Clinopodium*** ***vulgare*** L.

along roads and trails

5 (HLUC)

***Lamium*** ***amplexicaule*** L.

broadleaf forests

6 (HLUC)

***Lamium*** ***bifidum*** Cirillo

uncultivated lands

10 (HLUC)

***Lamium*** ***flexuosum*** Ten.

broadleaf forests

6 (Herb. Faraoni, Herb. Caruso, Herb. Soldano); 8 (APP)

***Lamium*** ***galeobdolon*** (L.) L. subsp. ***montanum*** (Pers.) Hayek

broadleaf forests

3 (Herb. Faraoni, Herb. Salerno); 6 (PORUN)

***Lamium*** ***garganicum*** L. subsp. ***garganicum***

broadleaf forests

4a (HLUC)

***Lamium*** ***purpureum*** L.

along trails

6 (HLUC)

***Melissa*** ***officinalis*** L. subsp. ***altissima*** (Sm.) Arcang.

forest edges

4b (Herb. Lattanzi); 7 (Herb. Cancellieri, MSNM)

***Melittis*** ***melissophyllum*** L. subsp. ***albida*** (Guss.) P.W.Ball

broadleaf forests

2 (Herb. Salerno, HLUC, MSNM, PORUN); 8 (APP)

***Mentha*** ***suaveolens*** Ehrh.

wetlands

12 (APP)

E ***Micromeria*** ***graeca*** (L.) Benth. ex Rchb. subsp. ***tenuifolia*** (Ten.) Nyman

dry grasslands and garrigues

7 (Herb. Cancellieri); 8 (APP, Herb. Cancellieri, HLUC, MSNM); 9 (CLU, GE, Herb. Faraoni, Herb. Salerno); 10 (BI); 12 (Herb. Caruso)

***Micromeria*** ***juliana*** (L.) Benth. ex Rchb.

ruins and rocks

7 (BI, CLU, MSNM, PORUN)

***Origanum*** ***vulgare*** L. subsp. ***viridulum*** (Martrin-Donos) Nyman

Margini forestali

3 (CLU, Herb. Lavezzo, HLUC)

***Phlomis*** ***herba-venti*** L. subsp. ***herba-venti***

pastures

1 (Herb. Salerno, PORUN)

***Prunella*** ***laciniata*** (L.) L.

pastures

4a (MSNM); 5 (MSNM); 8 (PORUN); 10 (CLU, Herb. Faraoni, Herb. Cancellieri, PORUN)

***Prunella*** ***vulgaris*** L. subsp. ***vulgaris***

pastures

5 (Herb. Cancellieri); 8 (Herb. Cancellieri)

***Salvia*** ***rosmarinus*** Schleiden

[*Rosmarinus* *officinalis* L.]

dry grasslands and garrigues

9 (Herb. Cancellieri)

Probably originated from cultivated plants

***Salvia*** ***officinalis*** L. var. ***angustifolia*** Ten.

dry grasslands and garrigues

9 (APP, BI, CLU, GE, Herb. Faraoni, Herb. Caruso, Herb. Cancellieri, Herb. Salerno, Herb. Lavezzo, PORUN, Herb. Soldano)

***Salvia*** ***verbenaca*** L.

pastures and uncultivated lands

5 (CLU); 7 (Herb. Faraoni, Herb. Cancellieri)

***Scutellaria columnae*** All. subsp*.* ***columnae***

broadleaf forests

8 (APP, CLU, GE, Herb. Caruso, Herb. Cancellieri, HLUC, MSNM, PORUN); 9 (HLUC)

***Stachys*** ***germanica*** L. subsp. ***salviifolia*** (Ten.) Gams

dry grasslands and garrigues

1 (HLUC); 5 (MSNM); 8 (Herb. Cancellieri); 11 (CLU, PORUN)

***Stachys*** ***heraclea*** All.

uncultivated lands and pastures

1 (Herb. Faraoni, HLUC); 10 (APP, CLU)

***Stachys*** ***recta*** L. subsp. ***grandiflora*** (Caruel) Arcang.

dry grasslands and garrigues

8 (PORUN)

***Stachys*** ***romana*** (L.) E.H.L.Krause subsp. ***romana***

[*Sideritis* *romana* L. subsp. *romana*]

dry grasslands and garrigues

1 (Herb. Salerno, PORUN); 8 (Herb. Faraoni, Herb. Cancellieri)

***Stachys*** ***sylvatica*** L.

broadleaf forests and edges

5 (PORUN); 6 (Herb. Caruso)

***Teucrium*** ***capitatum*** L. subsp. ***capitatum***

dry grasslands and garrigues

1 (Herb. Salerno); 4a (Herb. Caruso); 5 (Herb. Cancellieri); 9 (APP, Herb. Faraoni, Herb. Cancellieri, Herb. Salerno, PORUN)

***Teucrium chamaedrys*** L. subsp. ***chamaedrys***

dry grasslands and garrigues

8 (APP, Herb. Faraoni, PORUN); 12 (APP)

***Teucrium*** ***flavum*** L. subsp. ***flavum***

dry grasslands and garrigues

8 (HLUC); 9 (HLUC, Herb. Faraoni, Herb. Cancellieri)

***Teucrium*** ***montanum*** L.

dry grasslands and garrigues

5 (Herb. Salerno)

***Teucrium*** ***siculum*** (Raf.) Guss. subsp. ***siculum***

broadleaf forests

8 (Herb. Caruso, Herb. Salerno, MSNM); 9 (HLUC)

***Thymus*** ***longicaulis*** C. Presl × ***Thymus*** ***striatus*** Vahl

pastures

5 (APP)

***Thymus*** ***longicaulis*** C.Presl subsp. ***longicaulis***

pastures

3 (APP, GE, Herb. Faraoni, Herb. Caruso, Herb. Cancellieri, MSNM); 4a (APP); 5 (APP); 10 (APP, Herb. Faraoni); 12 (APP, GE)

*BAS ***Thymus*** ***moesiacus*** Velen.

pastures

4a (APP, CLU); 4c (APP)

The populations of central and southern Italy previously referred to *Th. oenipontanus* Heinr.Braun. are provisionally better included within the variability of *Th. moesiacus* (Bartolucci, ined., Bartolucci & Walter 2015).

***Thymus*** ***striatus*** Vahl subsp. ***acicularis*** (Waldst. & Kit.) Ronniger

dry grasslands and garrigues

1 (HLUC); 4a (APP, MSNM); 4c (APP, MSNM); 5 (APP, GE, Herb. Faraoni, PORUN, APP, BI, CLU, HLUC)

For the taxonomic treatment of *Th. striatus* Vahl see Bartolucci *et al*. (2013) and Bartolucci & Peruzzi (2014).

***Thymus*** ***striatus*** Vahl subsp. ***striatus***

dry grasslands and garrigues

9 (APP, CLU, Herb. Lattanzi, Herb. Cancellieri, Herb. Salerno, HLUC, PORUN)

Oleaceae

***Fraxinus*** ***ornus*** L. subsp. ***ornus***

broadleaf forests

1 (Herb. Salerno)

***Ligustrum*** ***vulgare*** L.

broadleaf forests

7 (Herb. Cancellieri)

Orobanchaceae

***Bellardia*** ***latifolia*** (L.) Cuatrec.

[*Parentucellia* *latifolia* (L.) Caruel]

pastures

6 (GE)

***Bellardia*** ***trixago*** (L.) All.

[*Bartsia* *trixago* L.]

pastures

5 (MSNM); 7 (BI); 8 (PORUN); 10 (PORUN)

***Euphrasia*** ***stricta*** D.Wolff ex J.F.Lehm.

pastures

3 (CLU, Herb. Salerno, MSNM); 4a (MSNM); 5 (Herb. Faraoni, Herb. Caruso, Herb. Lattanzi, Herb. Cancellieri); 6 (BI, GE, Herb. Faraoni, Herb. Cancellieri, Herb. Salerno, MSNM, PORUN)

***Lathraea*** ***squamaria*** L.

broadleaf forests

5 (HLUC)

***Orobanche*** ***amethystea*** Thuill.

uncultivated lands and pastures

11 (Herb. Soldano)

***Orobanche*** ***caryophyllacea*** Sm.

pastures

3 (HLUC); 4a (Herb. Lattanzi); 5 (MSNM); 6 (APP)

***Orobanche*** ***gracilis*** Sm.

dry grasslands and garrigues

5 (APP); 8 (Herb. Soldano); 4c (APP); 9 (HLUC)

***Orobanche*** ***minor*** Sm.

uncultivated lands and pastures

8 (APP, GE); 10 (APP); 12 (APP)

*****Rhinanthus*** ***alectorolophus*** (Scop.) Pollich subsp. ***alectorolophus***

pastures

4a (MSNM)

***Rhinanthus*** ***minor*** L.

pastures

1 (HLUC); 4a (BI, CLU); 5 (APP); 6 (CLU, GE, Herb. Faraoni, Herb. Cancellieri, HLUC, PORUN); 10 (GE, HLUC, MSNM, PORUN)

E ***Rhinanthus*** ***wettsteinii*** (Sterneck) Soó

pastures

1 (HLUC); 4a (Herb. Caruso); 5 (PORUN)

Plantaginaceae

E ***Digitalis*** ***micrantha*** Roth ex Schweigg.

forest edges

8 (PORUN)

***Kickxia*** ***commutata*** (Bernh. ex Rchb.) Fritsch subsp. ***commutata***

dry grasslands and garrigues

10 (Herb. Soldano)

***Linaria*** ***pelisseriana*** (L.) Mill.

pastures

5 (APP, Herb. Faraoni, Herb. Cancellieri)

E ***Linaria*** ***purpurea*** (L.) Mill.

pastures and along trails

1 (PORUN); 7 (Herb. Faraoni, Herb. Cancellieri, HLUC); 11 (BI)

***Linaria*** ***simplex*** (Willd.) Desf.

dry grasslands and garrigues

9 (HLUC)

***Misopates*** ***orontium*** (L.) Raf.

forest edges

8 (Herb. Lattanzi); 10 (BI)

***Plantago*** ***afra*** L. subsp. ***afra***

dry grasslands and garrigues

8 (Herb. Cancellieri)

***Plantago*** ***bellardii*** All.

dry grasslands and garrigues

8 (Herb. Cancellieri, HLUC); 12 (HLUC)

***Plantago*** ***holosteum*** Scop.

dry grasslands and garrigues

3 (Herb. Faraoni, Herb. Salerno); 4a (APP, MSNM); 6 (BI, CLU, Herb. Caruso, Herb. Cancellieri, Herb. Salerno, PORUN)

***Plantago*** ***lagopus*** L.

dry grasslands and garrigues

12 (PORUN)

***Plantago*** ***lanceolata*** L.

pastures

3 (Herb. Salerno)

***Veronica*** ***arvensis*** L.

pastures

3 (Herb. Salerno)

***Veronica*** ***beccabunga*** L.

wetlands

5 (HLUC)

***Veronica*** ***chamaedrys*** L. subsp. ***chamaedrys***

pastures and forest edges

3 (APP, BI, CLU, GE, Herb. Cancellieri, Herb. Salerno, HLUC, PORUN); 8 (APP, CLU)

***Veronica*** ***cymbalaria*** Bodard

ruins and shady rocks

7 (HLUC); 9 (HLUC)

A ***Veronica*** ***persica*** Poir.

pastures

6 (HLUC)

***Veronica*** ***scutellata*** L.

wetlands

6 (APP, CLU, GE, Herb. Lattanzi, Herb. Cancellieri, MSNM)

***Veronica*** ***serpyllifolia*** L.

pastures

3 (Herb. Caruso, HLUC); 5 (Herb. Lattanzi); 6 (CLU, GE, Herb. Salerno, Herb. Soldano)

Scrophulariaceae

***Scrophularia*** ***canina*** L.

[*Scrophularia* *canina* L. subsp. *bicolor* (Sm.) Greuter]

along roads and trails

1 (Herb. Cancellieri); 7 (PORUN)

***Scrophularia scopolii*** Hoppe ex Pers.

forest edges

5 (TO)

Aquifoliaceae

***Ilex*** ***aquifolium*** L.

broadleaf forests

3 (Herb. Caruso, PORUN); 5 (BI, Herb. Cancellieri); 6 (Herb. Soldano)

Asteraceae

E ***Achillea*** ***rupestris*** Huter, Porta & Rigo subsp. ***calcarea*** (Huter, Porta & Rigo) Greuter

dry grasslands and garrigues

4a (APP); 9 (APP, CLU, GE, Herb. Faraoni, Herb. Cancellieri, Herb. Salerno, Herb. Lavezzo)

***Achillea*** ***setacea*** Waldst. & Kit.

pastures

1 (HLUC); 3 (BI, HLUC); 5 (HLUC)

***Anthemis*** ***arvensis*** L. subsp. ***arvensis***

arable lands

9 (HLUC)

***Arctium lappa*** L.

along roads and trails

5 (MSNM)

***Artemisia*** ***alba*** Turra

dry grasslands and garrigues

8 (Herb. Lattanzi); 9 (CLU, Herb. Salerno, BI)

***Bellis*** ***sylvestris*** Cirillo

pastures

3 (Herb. Salerno, HLUC, PORUN); 6 (HLUC)

***Bombycilaena*** ***erecta*** (L.) Smoljan.

dry grasslands and garrigues

12 (APP)

E ***Carduus*** ***nutans*** L. subsp. ***perspinosus*** (Fiori) Arènes

pastures

4a (MSNM); 5 (MSNM); 7 (CLU, Herb. Lattanzi); 9 (CLU); 10 (Herb. Lavezzo)

***Carduus*** ***pycnocephalus*** L. subsp. ***pycnocephalus***

along roads and trails

12 (MSNM)

***Carthamus*** ***lanatus*** L.

dry grasslands and garrigues

12 (MSNM)

A ***Centaurea*** ***cyanus*** L.

arable lands

1 (HLUC)

***Centaurea*** ***deusta*** Ten.

dry grasslands and garrigues

3 (HLUC); 4a (APP, Herb. Caruso); 4c (Herb. Caruso); 5 (APP, Herb. Caruso, HLUC, MSNM); 6 (APP, Herb. Caruso); 7 (Herb. Caruso); 8 (APP, Herb. Caruso); 11 (APP, Herb. Caruso)

***Centaurea*** ***jacea*** L. subsp. ***gaudinii*** (Boiss. & Reut.) Gremli

pastures

10 (CLU)

E ***Cirsium*** ***tenoreanum*** Petr.

pastures

3 (BI)

***Cota*** ***segetalis*** (Ten.) Holub

arable lands

4a (MSNM)

***Cota*** ***tinctoria*** (L.) J.Gay

arable lands

1 (HLUC); 2 (HLUC)

***Cota*** ***triumfettii*** (L.) J.Gay

[*Anthemis* *triumfetti* All.]

pastures

5 (CLU); 6 (Herb. Lattanzi)

***Crepis*** ***lacera*** Ten. subsp. ***lacera***

pastures

4a (MSNM)

***Crepis*** ***leontodontoides*** All.

broadleaf forests

1 (Herb. Cancellieri); 3 (Herb. Cancellieri); 5 (MSNM)

***Crepis neglecta*** L.

dry grasslands and garrigues

1 (BI); 5 (Herb. Cancellieri); 7 (HLUC); 10 (Herb. Salerno, Herb. Soldano)

***Crepis*** ***rubra*** L.

dry grasslands and garrigues

1 (Herb. Cancellieri, Herb. Salerno, HLUC); 5 (APP); 8 (PORUN); 11 (PORUN, Herb. Soldano)

***Crupina*** ***crupinastrum*** (Moris) Vis.

arable lands

1 (Herb. Faraoni, Herb. Cancellieri, Herb. Salerno, HLUC); 11 (MSNM)

***Crupina*** ***vulgaris*** Cass.

dry grasslands and garrigues

1 (PORUN); 5 (CLU, GE); 9 (CLU, Herb. Faraoni, Herb. Lattanzi, Herb. Cancellieri, Herb. Salerno, PORUN); 11 (CLU)

***Doronicum*** ***orientale*** Hoffm.

beech forests

6 (HLUC)

E ***Echinops*** ***siculus*** Strobl

forest edges

8 (APP)

A ***Erigeron*** ***sumatrensis*** Retz.

along roads and trails

7 (TO, HLUC)

***Filago*** ***germanica*** (L.) Huds.

[*Filago* *vulgaris* Lam.]

dry grasslands and garrigues

1 (Herb. Salerno); 12 (CLU, GE)

***Filago*** ***pyramidata*** L.

dry grasslands and garrigues

8 (CLU, Herb. Cancellieri, MSNM, PORUN); 9 (CLU, HLUC, PORUN)

***Helichrysum*** ***italicum*** (Roth) G.Don subsp. ***italicum***

dry grasslands and garrigues

7 (Herb. Cancellieri)

***Hypochaeris*** ***achyrophorus*** L.

along trails

4a (HLUC); 9 (Herb. Salerno, HLUC)

***Hypochaeris*** ***cretensis*** (L.) Bory & Chaub.

pastures

4a (APP); 5 (Herb. Lattanzi); 6 (APP); 7 (CLU)

***Inula*** ***helenium*** L. subsp. ***helenium***

along roads and trails

6 (HLUC, PORUN)

***Jurinea*** ***mollis*** (L.) Rchb. subsp. ***mollis***

dry grasslands and garrigues

1 (HLUC); 4a (BI, GE, Herb. Caruso, Herb. Lattanzi, MSNM); 5 (Herb. Cancellieri, HLUC, PORUN); 6 (Herb. Soldano)

***Lactuca*** ***muralis*** (L.) Gaertn.

broadleaf forests

3 (HLUC); 8 (BI, Herb. Faraoni)

***Lactuca*** ***viminea*** (L.) J.Presl & C.Presl subsp. ***viminea***

along trails

7 (HLUC); 8 (MSNM)

***Leontodon*** ***crispus*** Vill.

dry grasslands and garrigues

3 (Herb. Cancellieri, HLUC, PORUN); 4a (APP, BI); 5 (Herb. Lattanzi, MSNM); 6 (Herb. Faraoni, HLUC); 8 (Herb. Cancellieri, MSNM); 9 (BI HLUC)

***Leontodon*** ***hispidus*** L.

dry grasslands and garrigues

8 (CLU, Herb. Salerno)

***Leontodon*** ***tuberosus*** L.

pastures

5 (HLUC)

***Logfia*** ***gallica*** (L.) Cosson & Germ.

[*Filago* *gallica* L.]

dry grasslands and garrigues

8 (APP, Herb. Cancellieri); 12 (GE, MSNM, PORUN)

***Matricaria*** ***chamomilla*** L.

arable lands

7 (Herb. Faraoni, Herb. Cancellieri)

***Onopordum*** ***illyricum*** L. subsp. ***illyricum***

uncultivated lands

8 (Herb. Soldano); 11 (GE, MSNM, PORUN)

***Pallenis*** ***spinosa*** (L.) Cass. subsp. ***spinosa***

dry grasslands and garrigues

1 (Herb. Salerno, HLUC. PORUN, ); 9 (Herb. Cancellieri)

***Pilosella*** ***bauhini*** (Schult.) Arv.-Touv.

pastures

12 (PORUN, CLU, MSNM)

***Pilosella*** ***officinarum*** Vaill.

pastures

4a (APP)

***Pilosella*** ***piloselloides*** (Vill.) Soják subsp. ***piloselloides***

pastures

4b (Herb. Lattanzi); 5 (Herb. Faraoni, Herb. Cancellieri); 6 (Herb. Soldano); 10 (CLU, HLUC); 10 (GE, MSNM)

**CAM ***Pilosella piloselloides*** (Vill.) Soják subsp. ***praealta*** (Vill. ex Gochnat) S.Bräut. & Greuter

dry grasslands and garrigues

5 (Herb. Lattanzi)

***Podospermum*** ***laciniatum*** (L.) DC. subsp. ***laciniatum***

[*Scorzonera* *laciniata* L. subsp. *laciniata*]

dry grasslands and garrigues

5 (Herb. Cancellieri, Herb. Salerno)

***Ptilostemon*** ***stellatus*** (L.) Greuter

along roads and trails

8 (APP, BI, GE, Herb. Faraoni, Herb. Cancellieri, Herb. Salerno, HLUC, MSNM, PORUN); 12 (MSNM, PORUN, Herb. Soldano)

***Ptilostemon*** ***strictus*** (Ten.) Greuter

broadleaf forests

8 (MSNM)

***Pulicaria*** ***dysenterica*** (L.) Bernh.

wet meadows

10 (APP)

***Rhagadiolus*** ***stellatus*** (L.) Gaertn.

arable lands

1 (Herb. Salerno)

***Scorzonera*** ***hirsuta*** (Gouan) L.

dry grasslands and garrigues

1 (HLUC); 4c (Herb. Caruso)

E ***Scorzonera*** ***villosa*** Scop. subsp. ***columnae*** (Guss.) Nyman

dry grasslands and garrigues

1 (PORUN); 5 (APP, Herb. Lattanzi, HLUC, MSNM, APP); 6 (APP, Herb. Lavezzo); 9 (Herb. Cancellieri)

***Scorzoneroides*** ***cichoriacea*** (Ten.) Greuter

[*Leontodon* *cichoraceus* (Ten.) Sanguin.]

pastures

3 (Herb. Cancellieri)

A ***Senecio*** ***inaequidens*** DC.

ruins and along trails

7 (PORUN)

***Sonchus*** ***asper*** (L.) Hill

uncultivated lands

1 (HLUC)

***Tanacetum*** ***parthenium*** (L.) Sch.Bip.

pastures and forest edges

12 (CLU, MSNM, PORUN)

***Tragopogon*** ***porrifolius*** L. subsp. ***eriospermus*** (Ten.) Greuter

pastures

4a (BI); 5 (APP, HLUC); 6 (CLU, Herb. Faraoni, Herb. Lattanzi, Herb. Lavezzo, HLUC)

***Tragopogon*** ***porrifolius*** L. subsp. ***porrifolius***

pastures

1 (HLUC); 9 (CLU); 11 (CLU, PORUN, Herb. Soldano)

***Tyrimnus*** ***leucographus*** (L.) Cass.

dry grasslands and garrigues, along trails

8 (Herb. Salerno); 9 (MSNM); 11 (CLU, GE, MSNM, PORUN, Herb. Soldano); 12 (HLUC, MSNM)

***Urospermum*** ***dalechampii*** (L.) F.W.Schmidt

dry grasslands and garrigues

12 (PORUN)

***Urospermum*** ***picroides*** (L.) Scop. ex F.W.Schmidt

dry grasslands and garrigues

8 (HLUC)

***Xeranthemum*** ***inapertum*** (L.) Mill.

dry grasslands and garrigues

1 (Herb. Cancellieri, Herb. Salerno, HLUC); 8 (BI, Herb. Caruso, HLUC); 12 (APP, MSNM, Herb. Soldano)

Campanulaceae

***Campanula*** ***erinus*** L.

shady rocks

7 (BI, Herb. Cancellieri); 8 (Herb. Faraoni, Herb. Cancellieri, PORUN)

***Campanula*** ***rapunculus*** L.

broadleaf forests

8 (BI, GE, Herb. Faraoni, Herb. Caruso, Herb. Cancellieri, MSNM, PORUN); 10 (HLUC); 12 (MSNM)

**BAS ***Jasione*** ***montana*** L.

dry grasslands and garrigues

12 (APP)

***Legousia*** ***falcata*** (Ten.) Janch.

dry grasslands and garrigues

8 (APP, Herb. Cancellieri, MSNM, PORUN); 11 (GE); 12 (APP)

***Legousia hybrida*** (L.) Delarbre

dry grasslands and garrigues

12 (APP, MSNM)

***Legousia*** ***speculum-veneris*** (L.) Chaix

arable lands

1 (Herb. Faraoni); 10 (HLUC)

Adoxaceae

***Viburnum*** ***tinus*** L. subsp. ***tinus***

broadleaf forests

8 (HLUC, Herb. Soldano)

Caprifoliaceae

***Centranthus*** ***ruber*** (L.) DC. subsp. ***ruber***

along roads and trails

8 (Herb. Faraoni)

**CAM, E ***Knautia*** ***lucana*** Lacaita & Szabó

pastures and forest edges

1 (HLUC, PORUN); 5 (CLU, Herb. Cancellieri, HLUC, PORUN); 6 (APP, CLU, Herb. Faraoni, Herb. Lattanzi, Herb. Lavezzo, MSNM); 11 (CLU, PORUN)

***Lomelosia*** ***crenata*** (Cirillo) Greuter & Burdet subsp. ***crenata***

dry grasslands and garrigues

4a (Herb. Caruso); 5 (Herb. Caruso, HLUC)

***Lonicera*** ***caprifolium*** L.

shrublands

1 (Herb. Cancellieri, HLUC)

***Lonicera*** ***etrusca*** Santi

shrublands

1 (Herb. Cancellieri, HLUC)

*BAS,CAM ***Scabiosa*** ***columbaria*** L. subsp. ***portae*** (Huter) Hayek

pastures

5 (APP, HLUC); 8 (MSNM); 9 (APP, CLU)

***Valeriana*** ***officinalis*** L.

pastures and forest edges

6 (CLU, HLUC, PORUN)

***Valerianella*** ***carinata*** Loisel.

pastures

5 (Herb. Salerno)

***Valerianella*** ***coronata*** (L.) DC.

dry grasslands and garrigues

1 (HLUC); 5 (CLU, GE, Herb. Faraoni, Herb. Lattanzi, Herb. Cancellieri, Herb. Salerno, MSNM)

***Valerianella*** ***dentata*** (L.) Pollich

pastures

5 (CLU, GE); 6 (CLU)

***Valerianella*** ***eriocarpa*** Desv.

dry grasslands and garrigues

5 (Herb. Faraoni, Herb. Cancellieri, Herb. Salerno, Herb. Soldano)

***Valerianella*** ***locusta*** (L.) Laterr.

pastures

5 (CLU)

**BAS ***Valerianella*** ***microcarpa*** Loisel.

pastures

10 (CLU, Herb. Salerno)

Apiaceae

***Anthriscus*** ***nemorosa*** (M.Bieb.) Spreng.

broadleaf forests

6 (HLUC)

***Bifora*** ***testiculata*** (L.) Spreng.

arable lands

1 (BI, Herb. Lavezzo, HLUC)

***Bupleurum*** ***baldense*** Turra

dry grasslands and garrigues

1 (Herb. Salerno); 5 (CLU); 8 (CLU, PORUN); 9 (APP, Herb. Faraoni, Herb. Caruso, Herb. Cancellieri, Herb. Salerno, MSNM); 12 (MSNM)

***Bupleurum*** ***subovatum*** Link ex Spreng.

arable lands

1 (HLUC, PORUN)

***Chaerophyllum*** ***nodosum*** (L.) Crantz

[*Myrrhoides* *nodosa* (L.) Cannon]

dry grasslands and garrigues

1 (Herb. Salerno, PORUN)

***Chaerophyllum*** ***temulum*** L.

broadleaf forests

1 (Herb. Cancellieri); 3 (Herb. Cancellieri); 7 (HLUC); 8 (Herb. Cancellieri, PORUN)

***Conium maculatum*** L. subsp. ***maculatum***

beech forests

5 (PORUN); 10 (PORUN)

***Dichoropetalum*** ***schottii*** (Bess. ex DC.) Pimenov & Kljuykov

[*Peucedanum* *schottii* Besser ex DC.]

shrublands

6 (CLU)

***Elaeoselinum*** ***asclepium*** (L.) Bertol. subsp. ***asclepium***

dry grasslands and garrigues

8 (GE, Herb. Faraoni, MSNM, PORUN); 9 (HLUC)

***Oenanthe*** ***fistulosa*** L.

wetlands

5 (HLUC); 6 (APP, HLUC, Herb. Lattanzi, MSNM, Herb. Soldano)

***Oenanthe*** ***lachenalii*** C.C.Gmel.

wetlands

10 (MSNM)

***Oenanthe*** ***pimpinelloides*** L.

along roads and trails

5 (Herb. Cancellieri)

***Opopanax*** ***chironium*** (L.) W.D.J.Koch

pastures and forest edges

5 (PORUN)

***Oreoselinum*** ***nigrum*** Delarbre

[*Peucedanum* *oreoselinum* (L.) Moench]

shrublands and pastures

8 (HLUC); 12 (Herb. Soldano)

***Orlaya*** ***platycarpos*** W.D.J.Koch

[*Orlaya* *daucoides* auct. non (L.) Greuter]

along roads and trails

1 (Herb. Faraoni, Herb. Cancellieri, HLUC, PORUN); 5 (GE, MSNM, PORUN); 8 (GE, Herb. Cancellieri, HLUC)

A ***Petroselinum*** ***crispum*** (Mill.) Fuss

dry grasslands and garrigues

7 (PORUN)

***Prangos*** ***ferulacea*** (L.) Lindl.

[*Cachrys* *ferulacea* (L.) Calest.]

along roads and trails

1 (Herb. Cancellieri, Herb. Salerno, HLUC, PORUN)

***Sanicula*** ***europaea*** L.

beech forests

3 (APP, Herb. Faraoni, Herb. Caruso, Herb. Cancellieri, Herb. Lavezzo, HLUC, PORUN)

***Scandix*** ***pecten-veneris*** L. subsp. ***pecten-veneris***

arable lands

1 (BI, Herb. Cancellieri, HLUC, PORUN); 7 (PORUN)

***Seseli*** ***montanum*** L. subsp. ***montanum***

dry grasslands and garrigues

5 (Herb. Cancellieri); 8 (Herb. Lattanzi); 9 (Herb. Cancellieri)

***Seseli*** ***peucedanoides*** (M.Bieb.) Koso-Pol.

dry grasslands and garrigues

6 (APP); 12 (Herb. Soldano)

***Smyrnium*** ***perfoliatum*** L. subsp. ***perfoliatum***

broadleaf forests

6 (APP, Herb. Faraoni, HLUC, MSNM, PORUN); 8 (Herb. Cancellieri)

***Tordylium*** ***apulum*** L.

pastures

12 (MSNM)

***Tordylium*** ***maximum*** L.

uncultivated lands

1 (Herb. Salerno, HLUC, PORUN); 5 (CLU); 9 (CLU)

***Torilis*** ***japonica*** (Houtt.) DC.

pastures

9 (CLU)

***Trinia glauca*** (L.) Dumort. subsp. ***glauca***

dry grasslands and garrigues

5 (APP, CLU, GE, Herb. Lattanzi, MSNM, PORUN)

**7.** Topographic map of surveyed sites (1-6). Floristic sampling sites are coded according to Table 1 and Figure 1; the cells grid is 1 × 1 km.


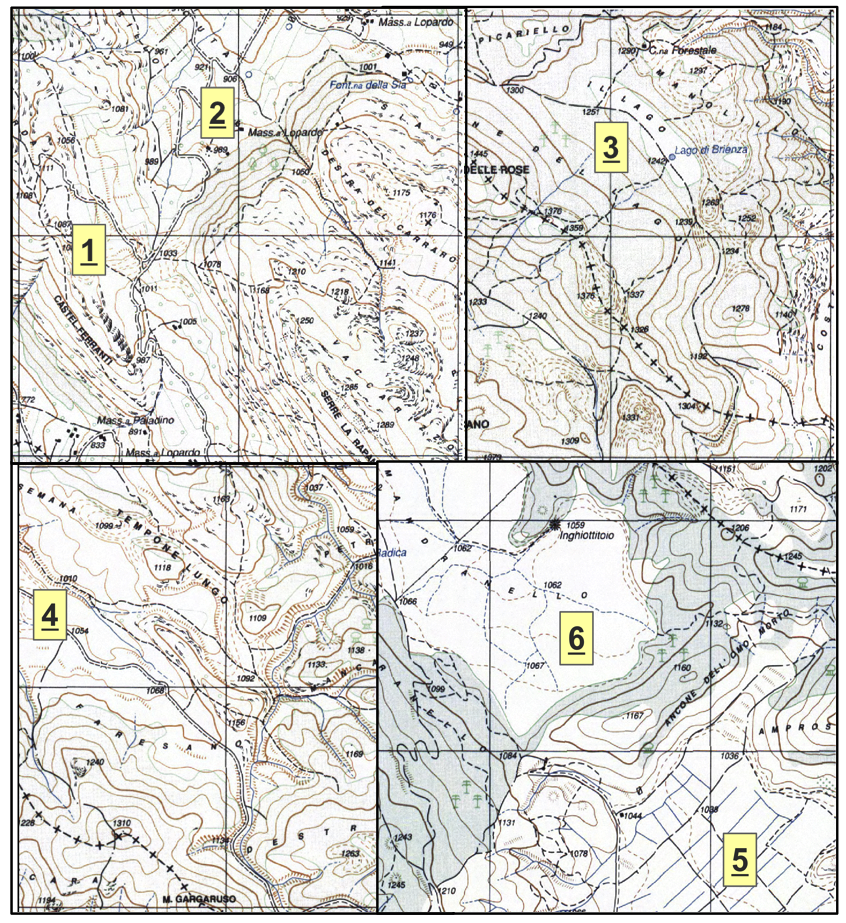


**8.** Topographic map of surveyed sites (7-12). Floristic sampling sites are coded according to the Table 1 and Figure 1; the cells grid is 1 × 1 km.


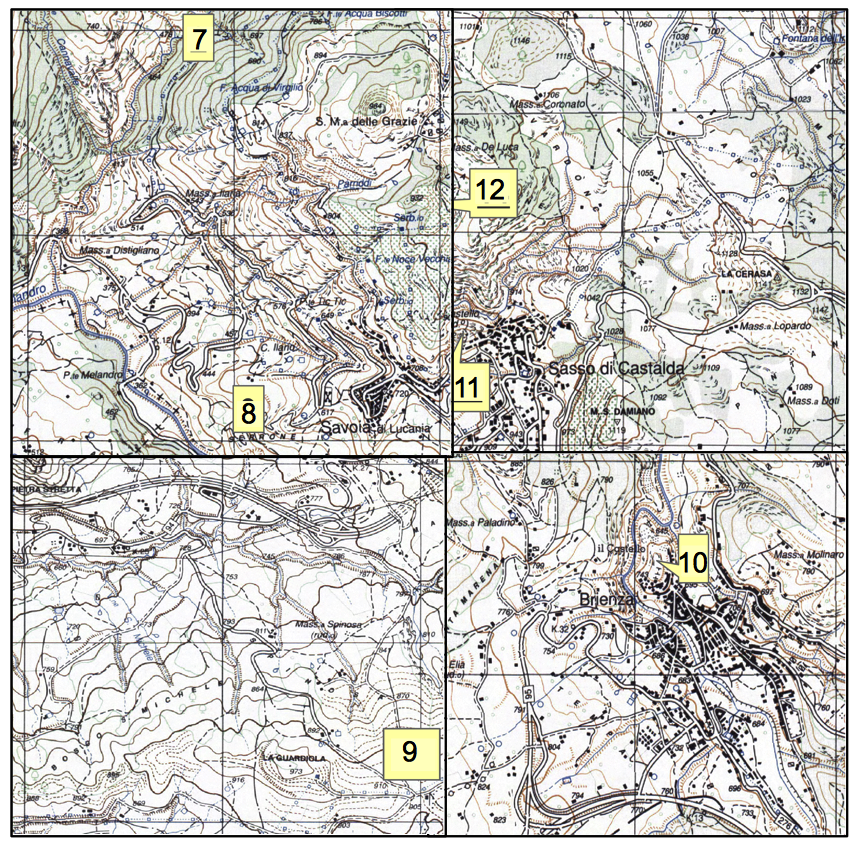


**10**

7

8

9
